# Supplementary material
Source: PubMed Central journal article supplement (PMC6647958)
Supplement: ao8b02013_si_001.pdf [file ao8b02013_si_001.pdf]

# Serendipitous formation of 2*H*-pyrazolo[3,4-*d*]pyridazin-7(6*H*)-ones from 3-arylsydnonones

Mahadev N. Kumbar<sup>‡</sup>, Saba Kauser J. Shaikh<sup>‡</sup>, Ravindra R. Kamble<sup>\*,‡</sup>, Praveen K. Bayannavar<sup>‡</sup>, Atulkumar A. Kamble<sup>‡</sup> and Raveendra K. Hunnur<sup>†</sup>

<sup>‡</sup>Department of Chemistry, Karnatak University, Dharwad-580003, Karnataka, India

<sup>†</sup> APL Research Centre, A Division of Aurobindo Pharma Ltd. 313, Batchupally, Hyderabad 500 072, India

## Supporting Information

### Table of Contents

**Figure S1-S38.** IR, <sup>1</sup>H NMR, <sup>13</sup>C NMR and Mass spectra for compounds **7a-7l**

**Figure S39.** Main crystallographic parameters of compound **4a** and **7d**

**Tables S1-S6.** Crystallographic parameters of compound **4a** and **7d**

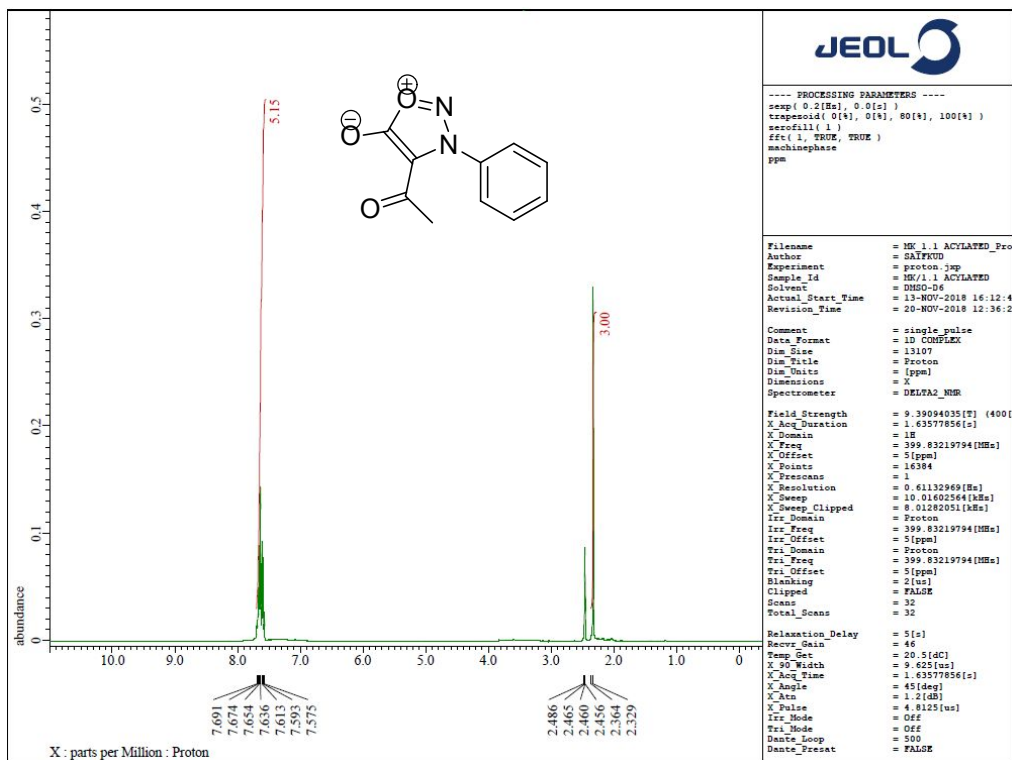

Figure S1: <sup>1</sup>H NMR Spectrum (DMSO-d<sub>6</sub>) of Compound 2a

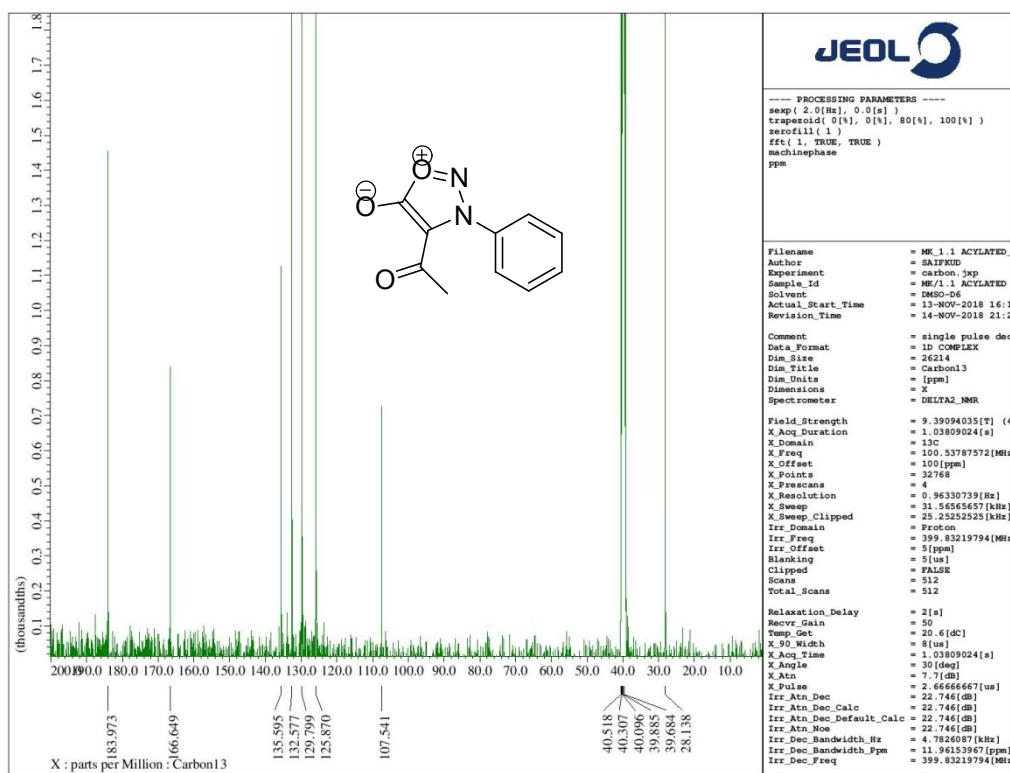

Figure S2: <sup>13</sup>C NMR Spectrum (DMSO-d<sub>6</sub>) of Compound 2a

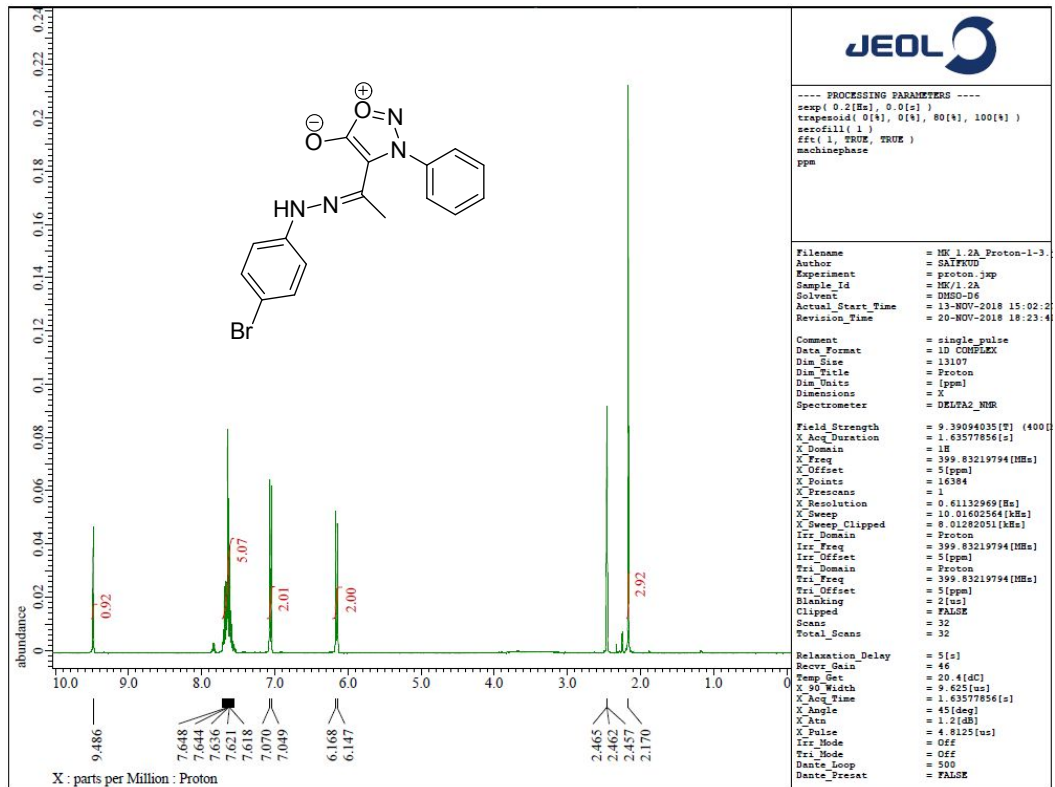

Figure S3: <sup>1</sup>H NMR Spectrum (DMSO-d<sub>6</sub>) of Compound 4c

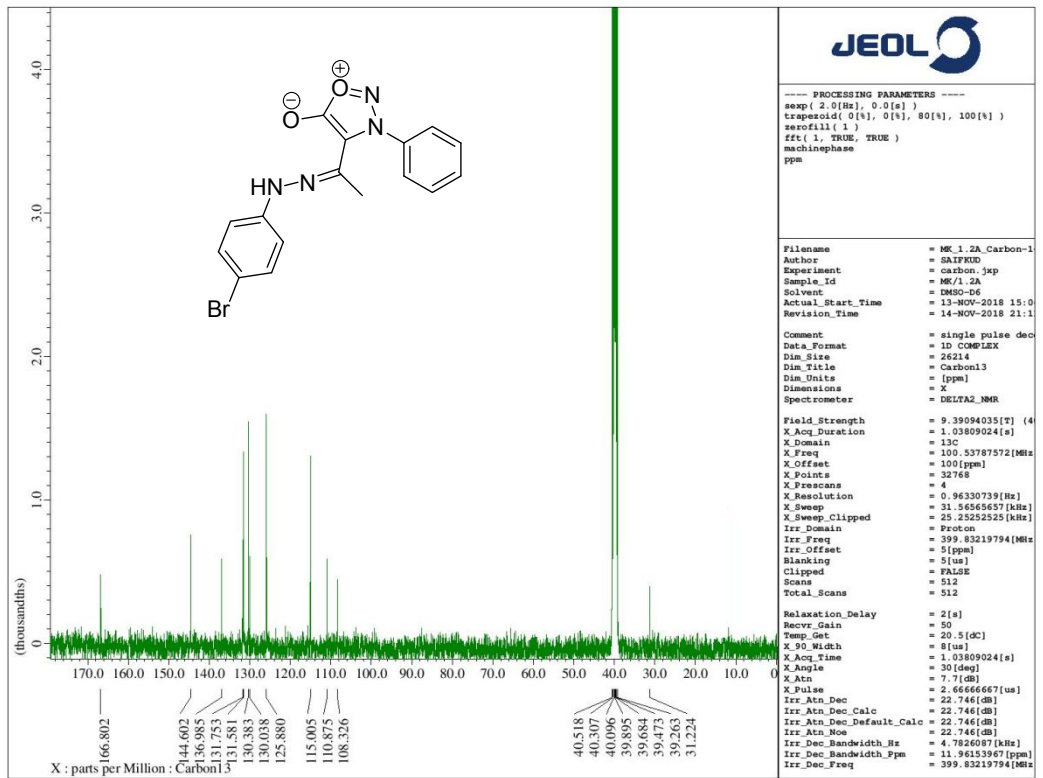

Figure S4:  $^{13}\text{C}$  NMR Spectrum (DMSO- $d_6$ ) of Compound 4c

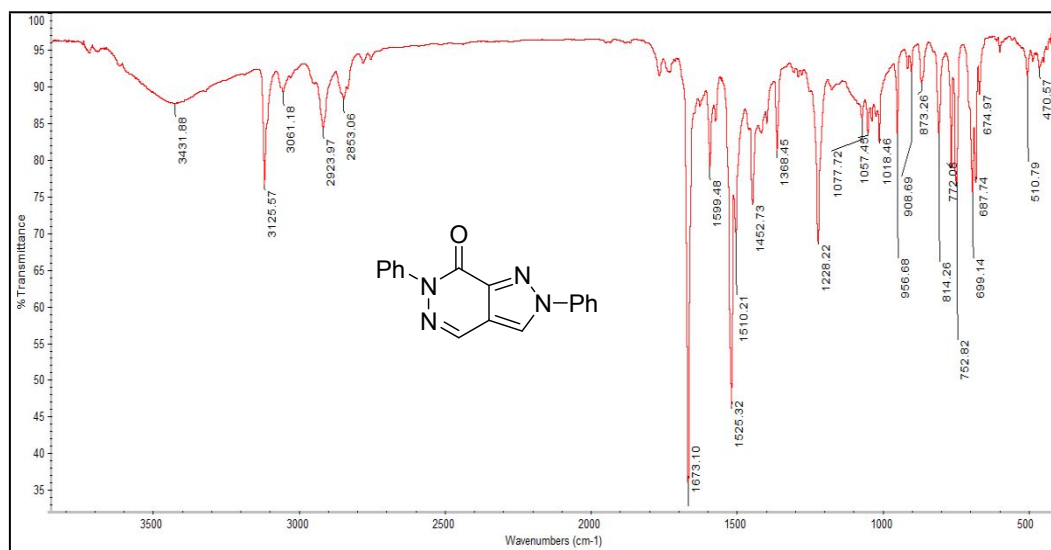

Figure S5: IR spectrum of compound 7a

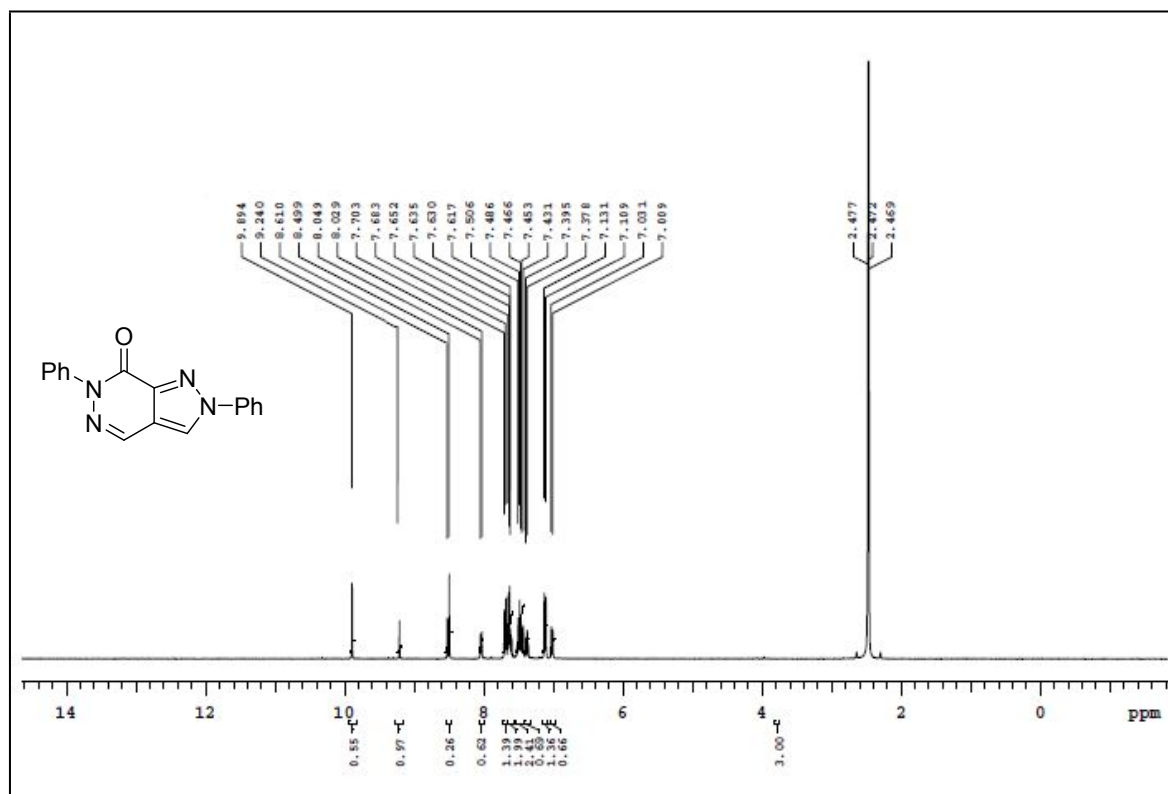

Figure S6:  $^1\text{H}$  NMR Spectrum (DMSO- $d_6$ ) of Compound 7a

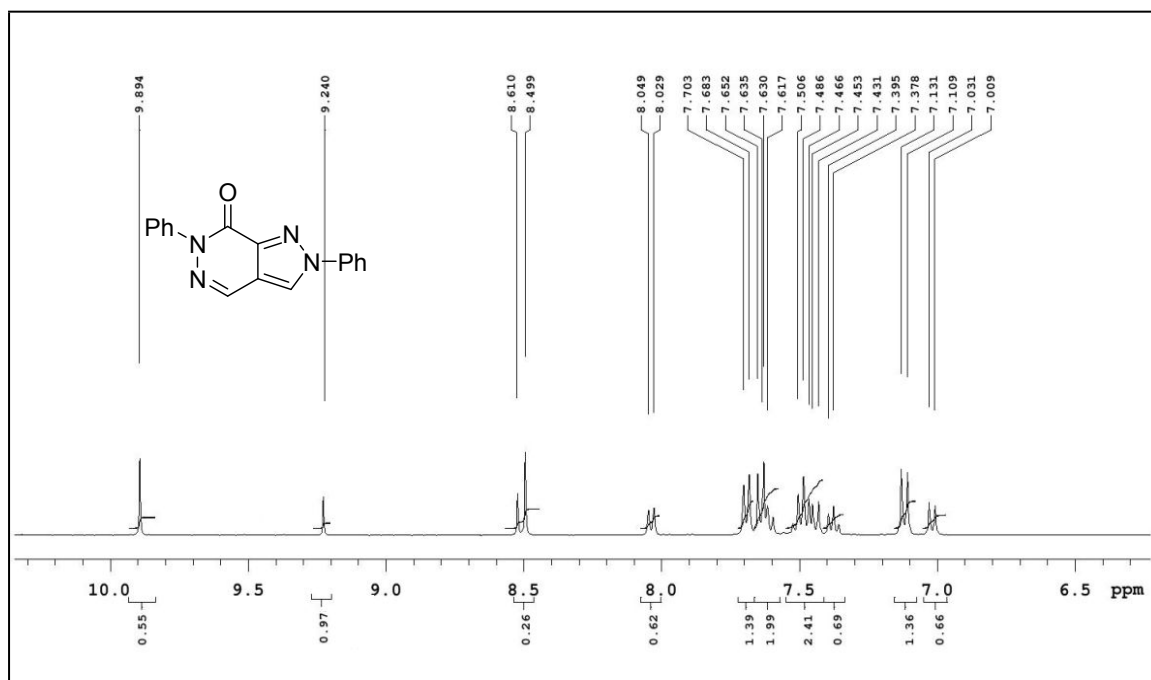

Figure S7: <sup>1</sup>H NMR Expansion spectrum of Compound 7a

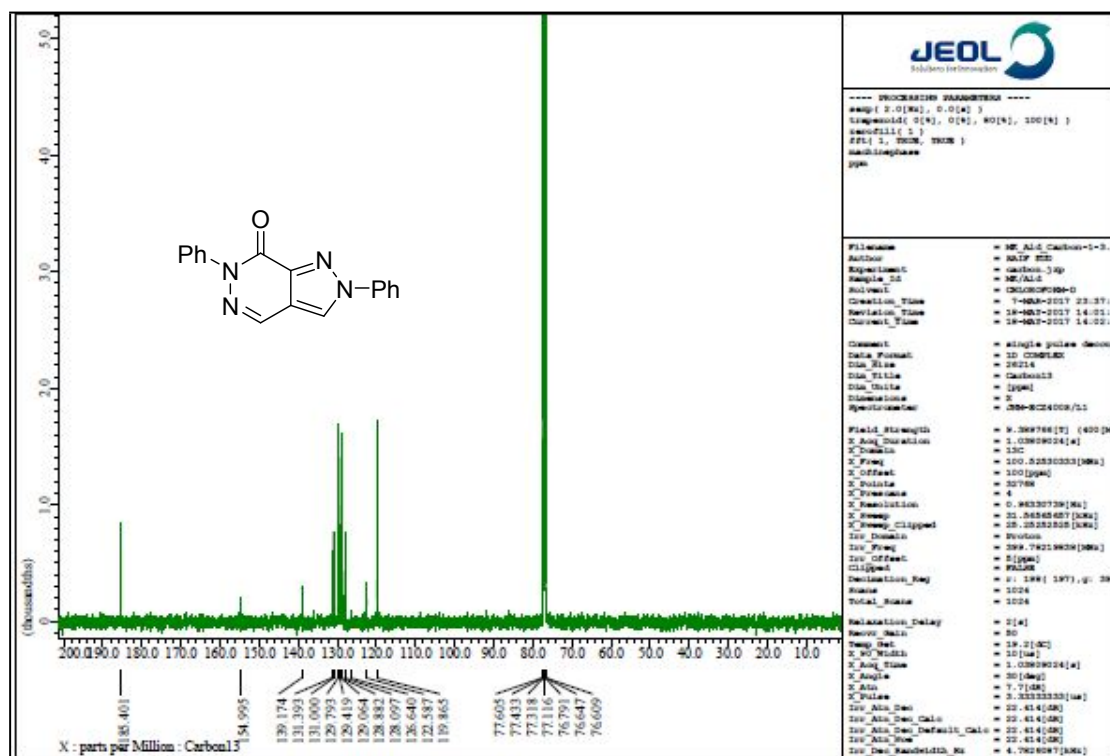

Figure S8: <sup>13</sup>C NMR Spectrum (DMSO-d<sub>6</sub>) of Compound 7a

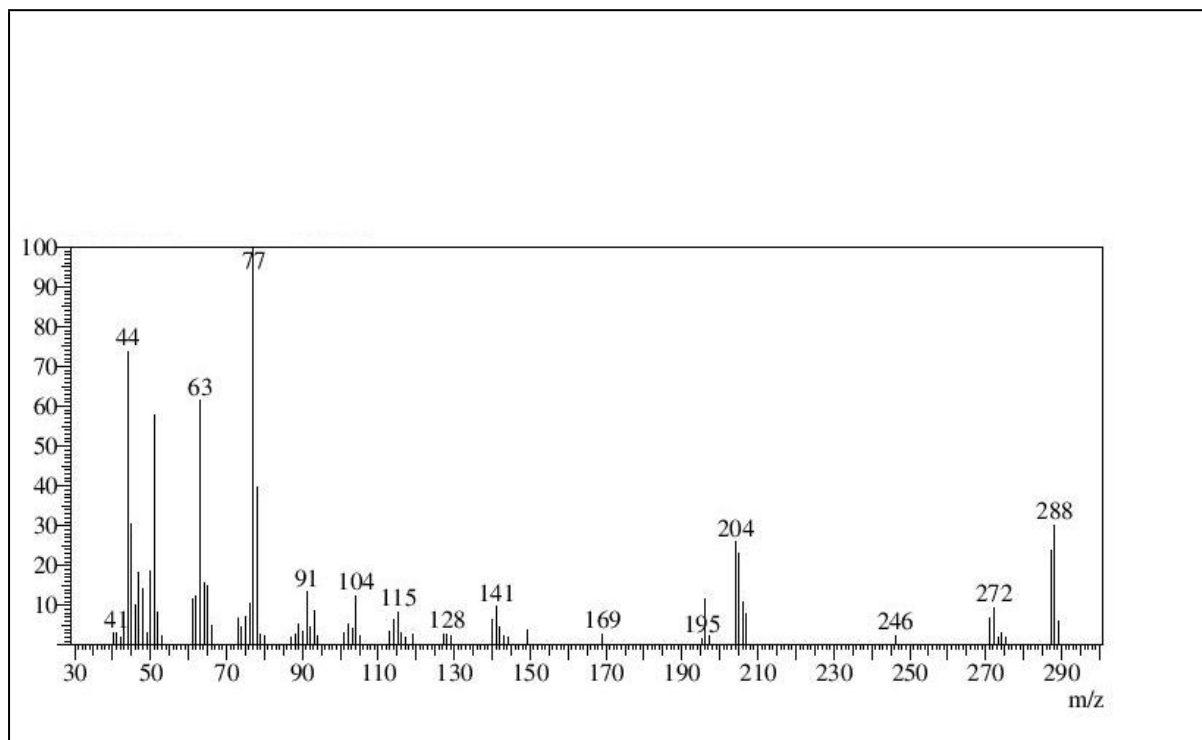

Figure S9: Mass spectrum of compound 7a

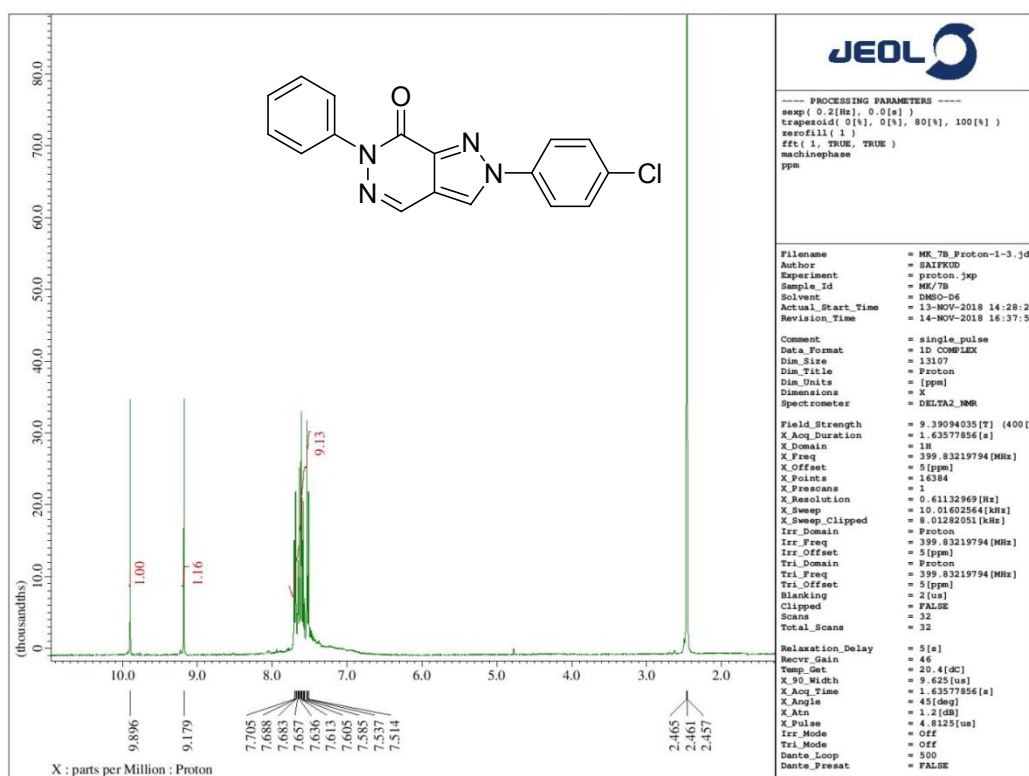

Figure S10: <sup>1</sup>H NMR Spectrum (DMSO-d<sub>6</sub>) of Compound 7b

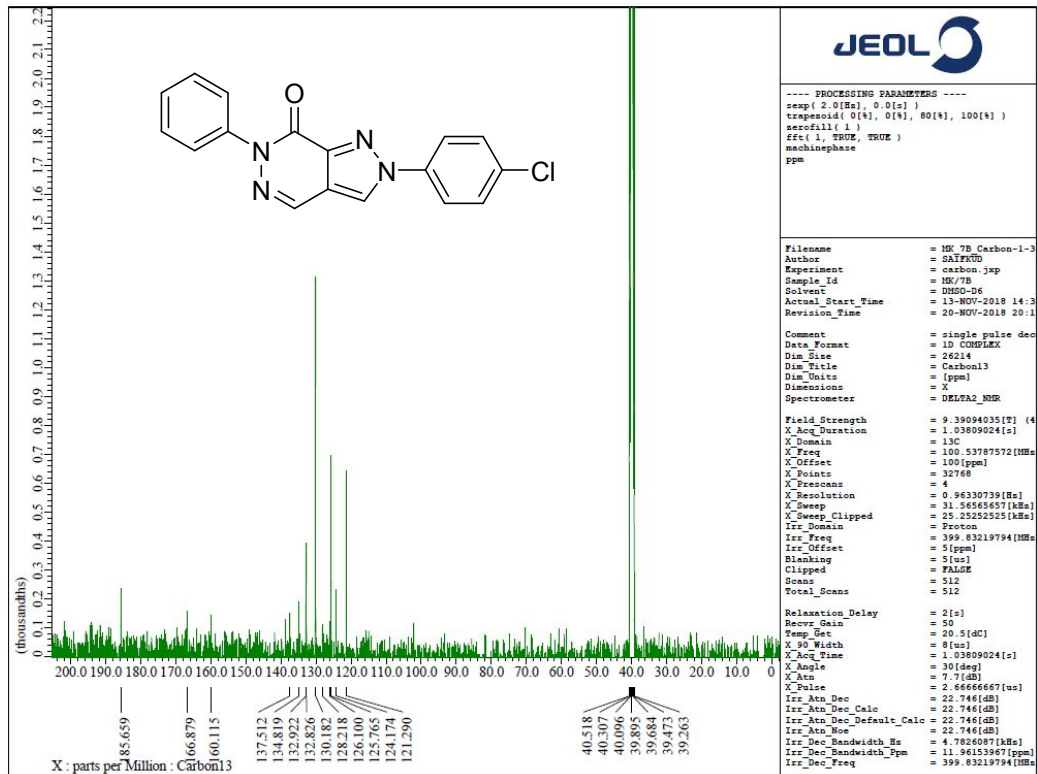

Figure S11: <sup>13</sup>C NMR Spectrum (DMSO-d<sub>6</sub>) of Compound 7b

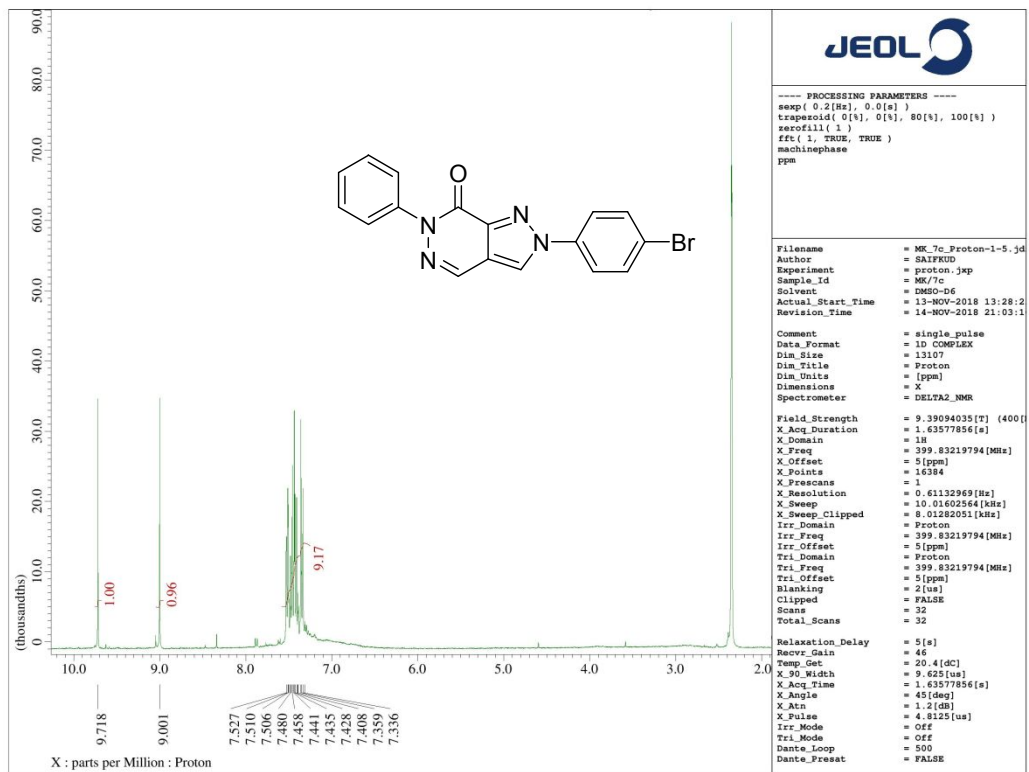

Figure S12: <sup>1</sup>H NMR Spectrum (DMSO-d<sub>6</sub>) of Compound 7c

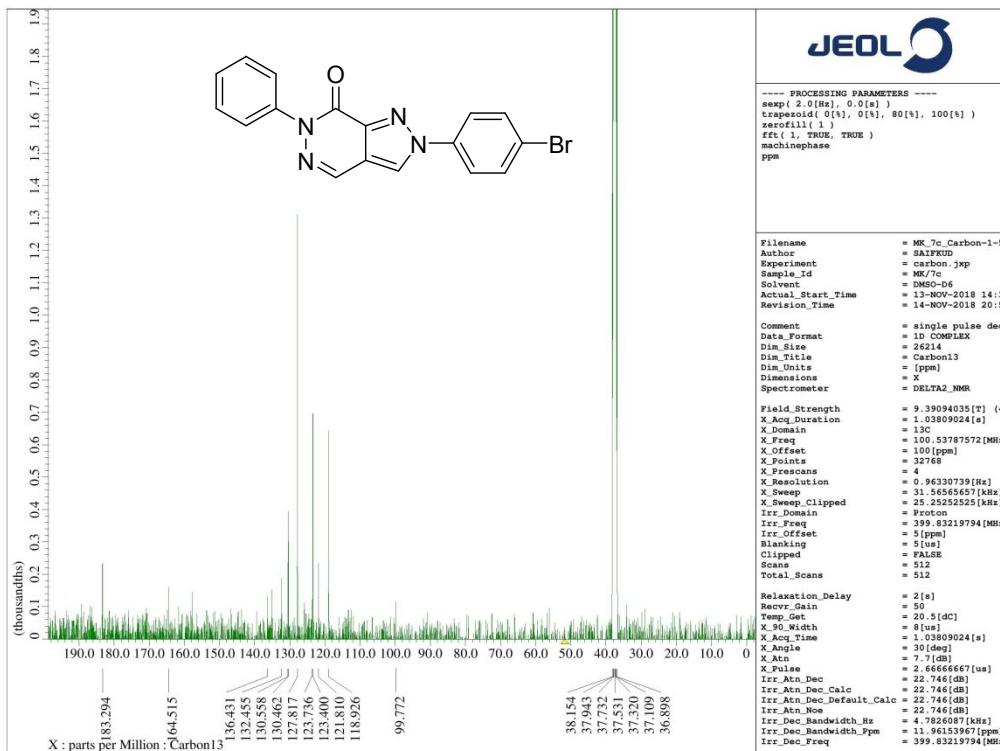

Figure S13:  $^{13}\text{C}$  NMR Spectrum (DMSO- $d_6$ ) of Compound 7c

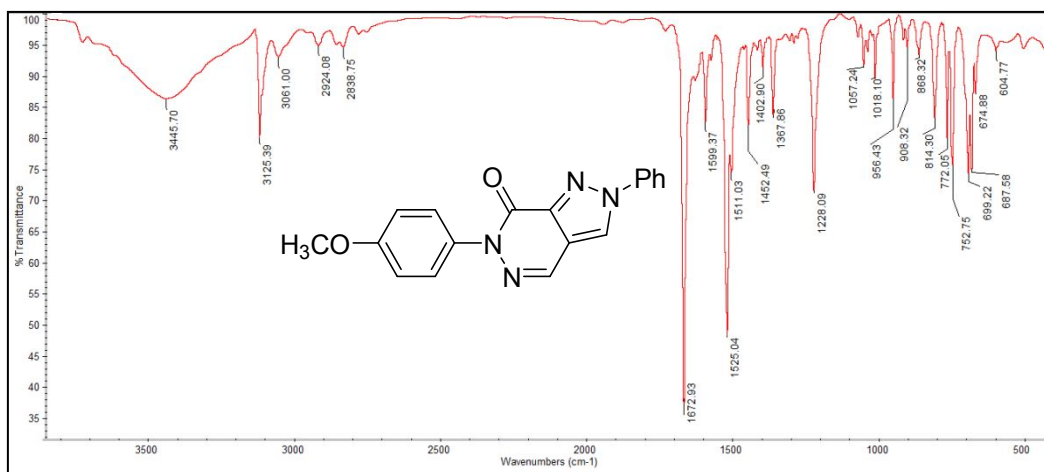

Figure S14: IR spectrum of compound 7d



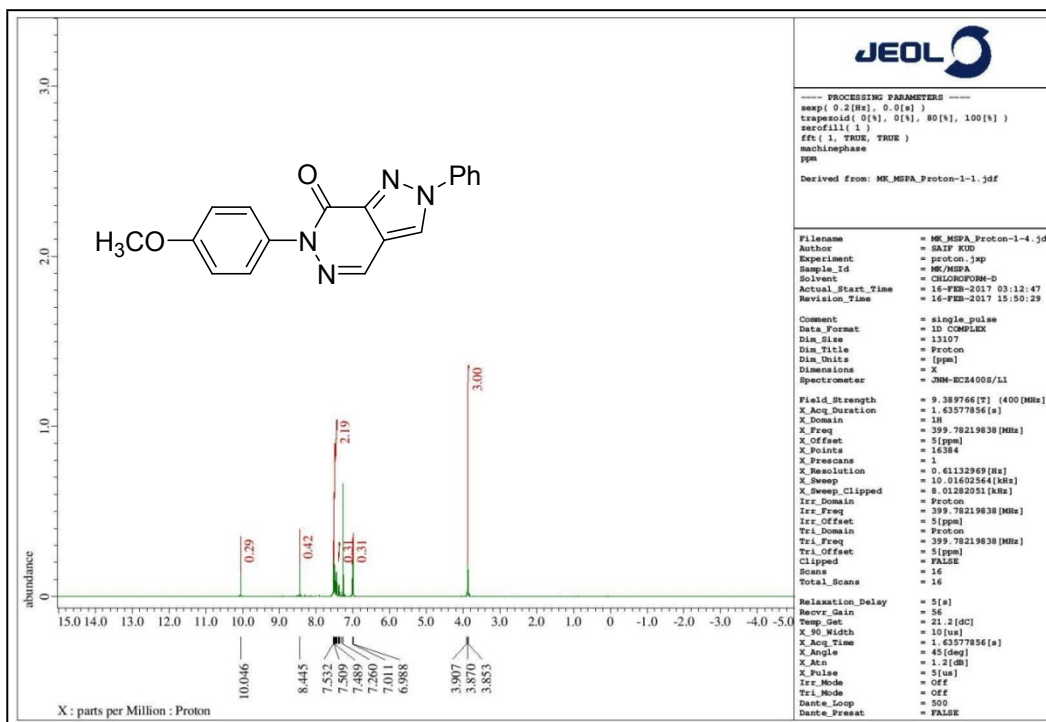

Figure S15: <sup>1</sup>H NMR Spectrum (DMSO-d<sub>6</sub>) of Compound 7d

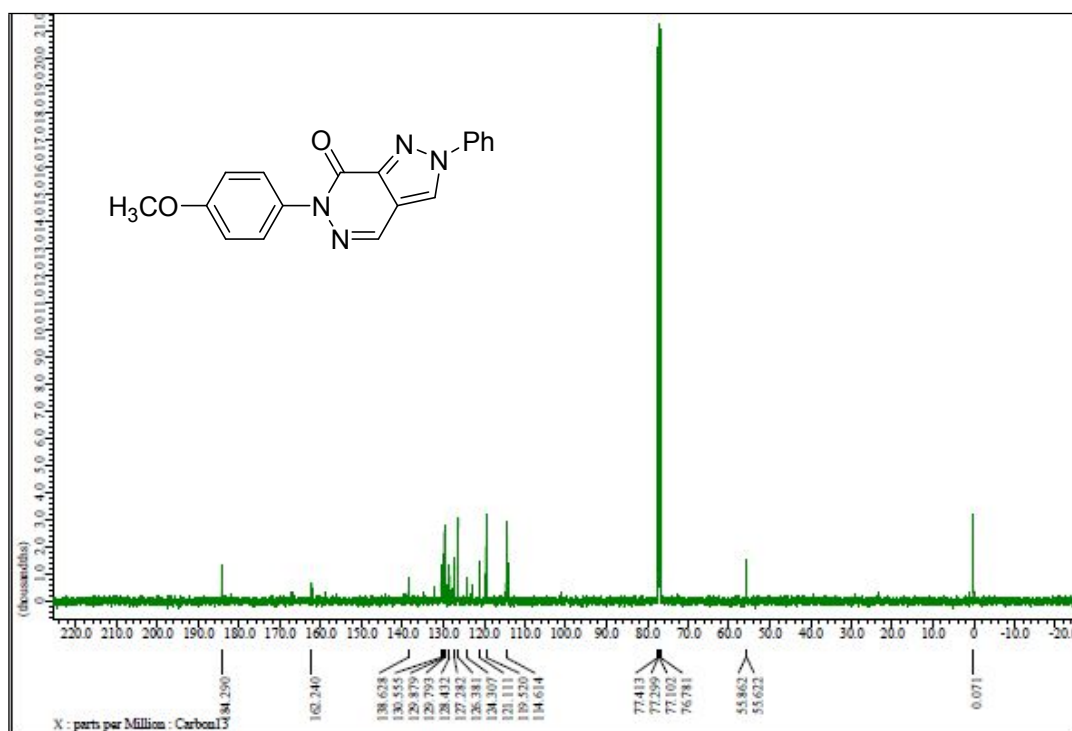

Figure S16: <sup>13</sup>C NMR Spectrum (DMSO-d<sub>6</sub>) of Compound 7d

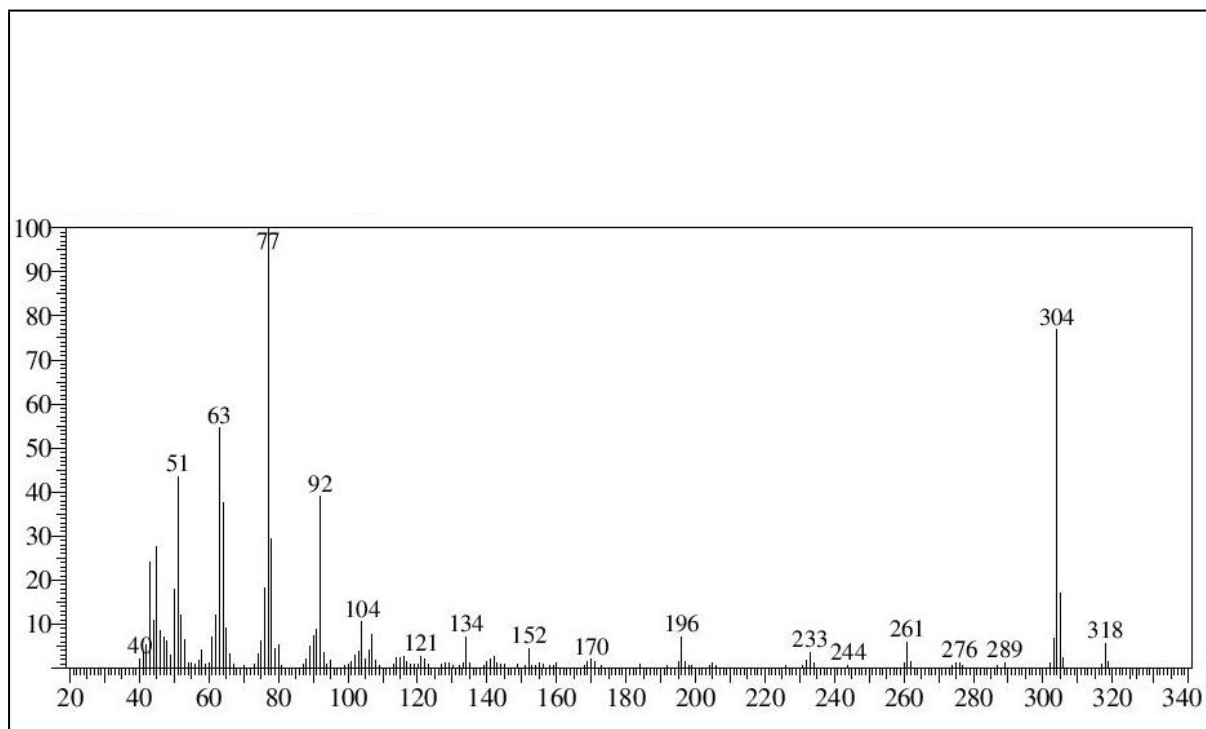

Figure S17: Mass spectrum of compound 7d

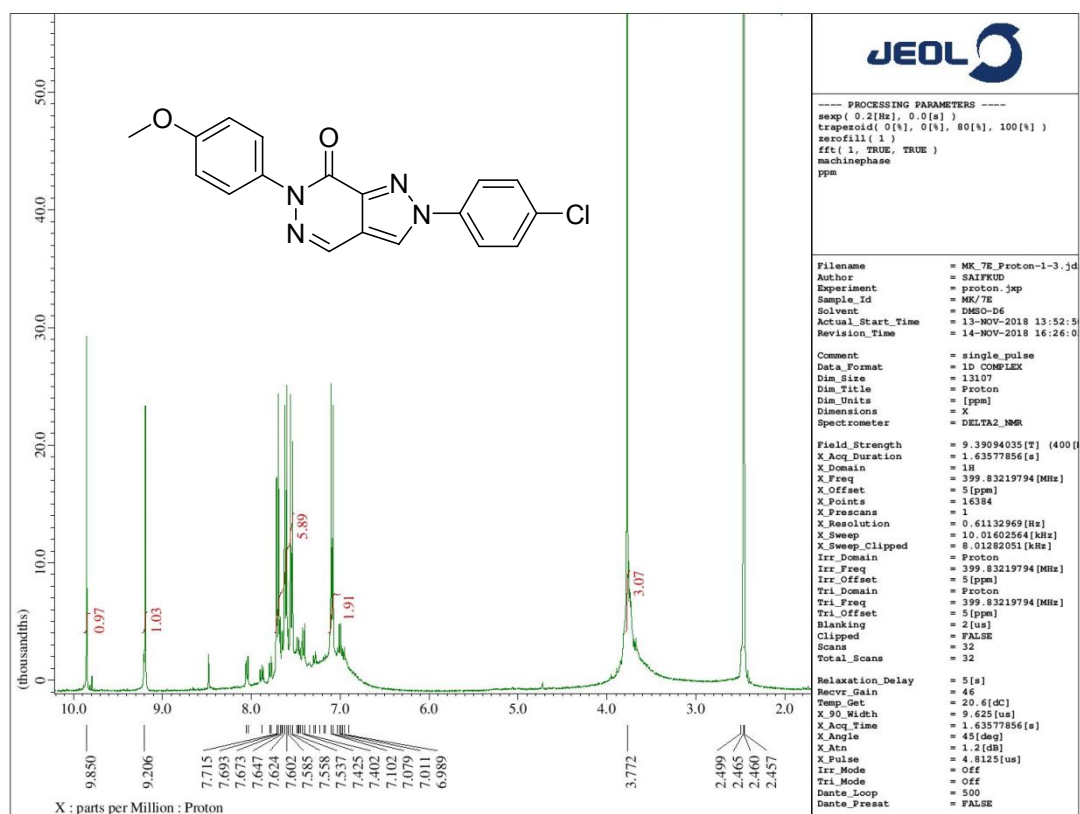

Figure S18: <sup>1</sup>H NMR Expansion Spectrum (DMSO-d<sub>6</sub>) of Compound 7e

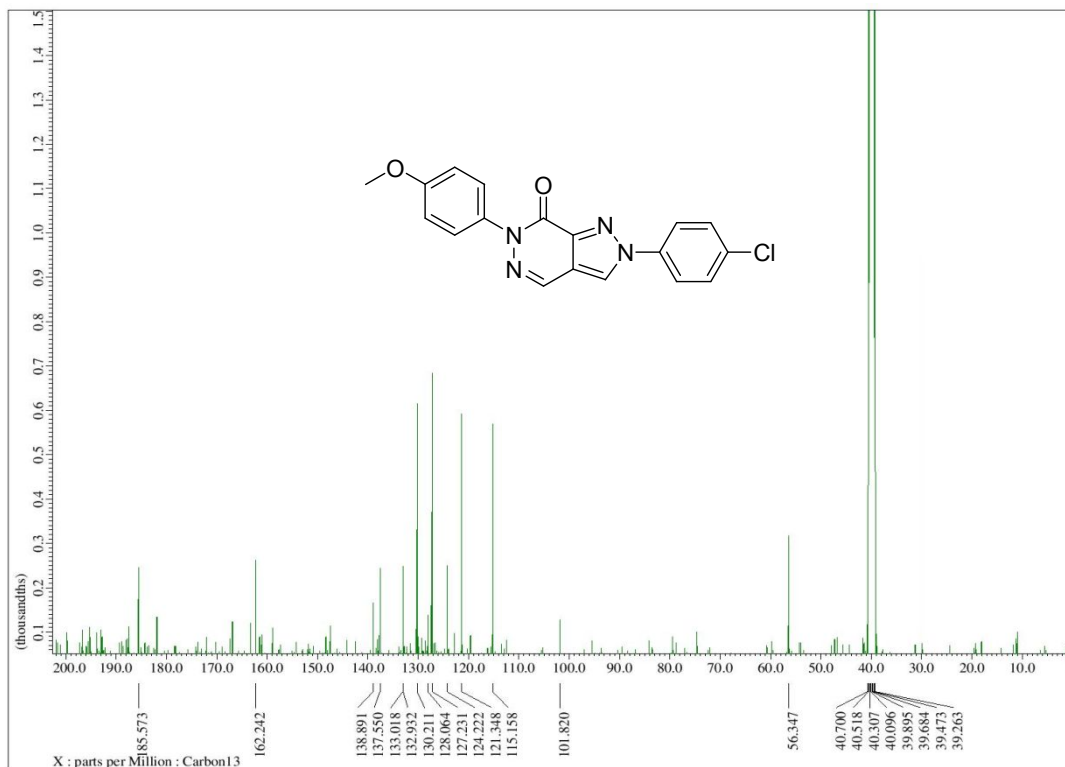

Figure S19: <sup>13</sup>C NMR Spectrum (DMSO-d<sub>6</sub>) of Compound 7e

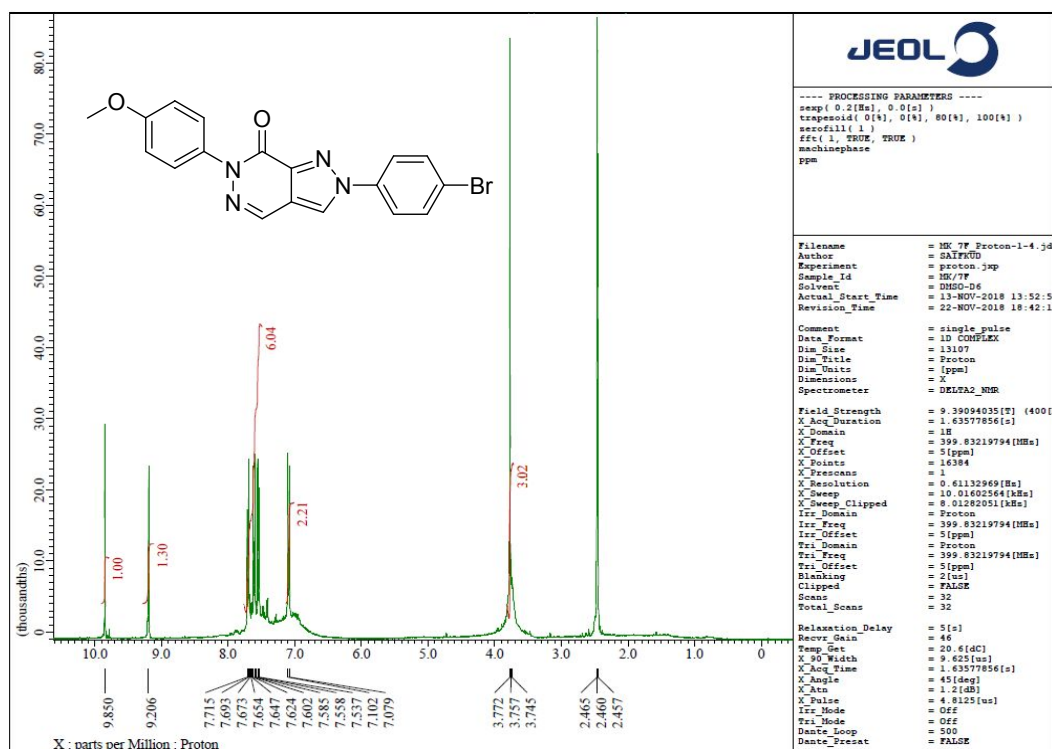

Figure S20: <sup>1</sup>H NMR Spectrum (DMSO-d<sub>6</sub>) of Compound 7f

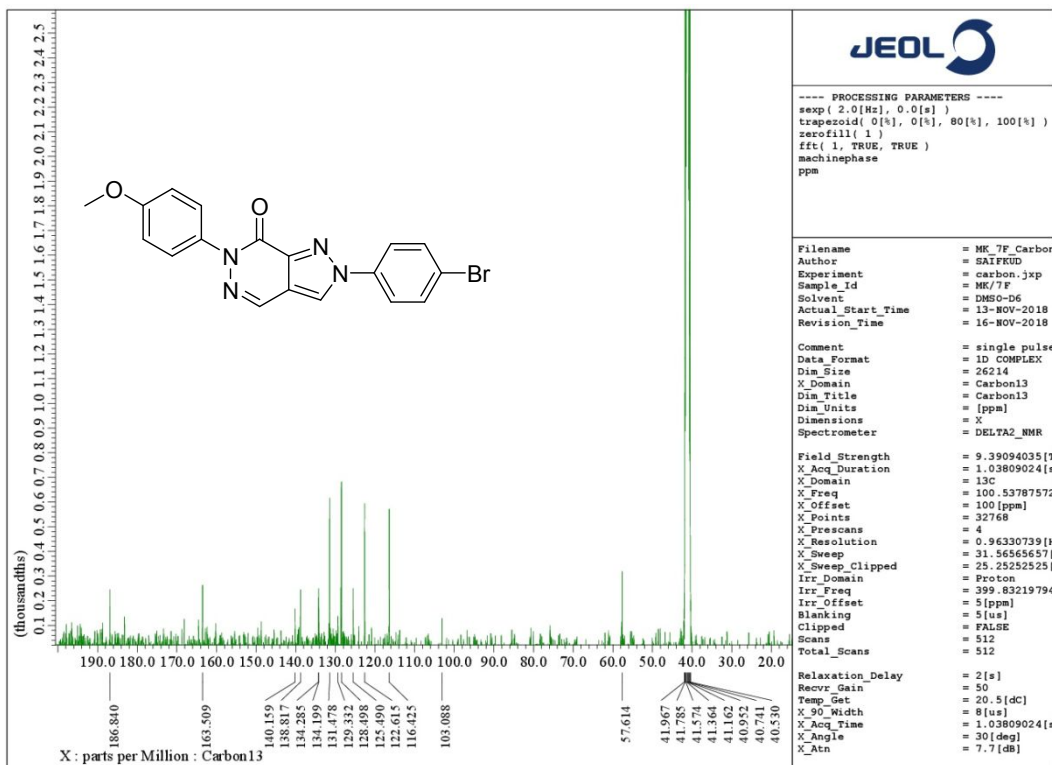

Figure S21: <sup>13</sup>C NMR Spectrum (DMSO-d<sub>6</sub>) of Compound 7f

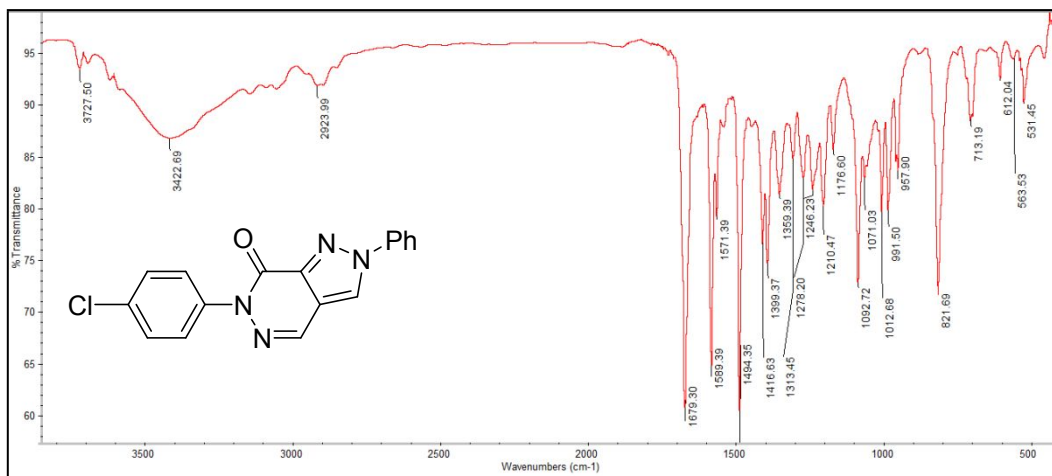

Figure S22: IR spectrum of compound 7g

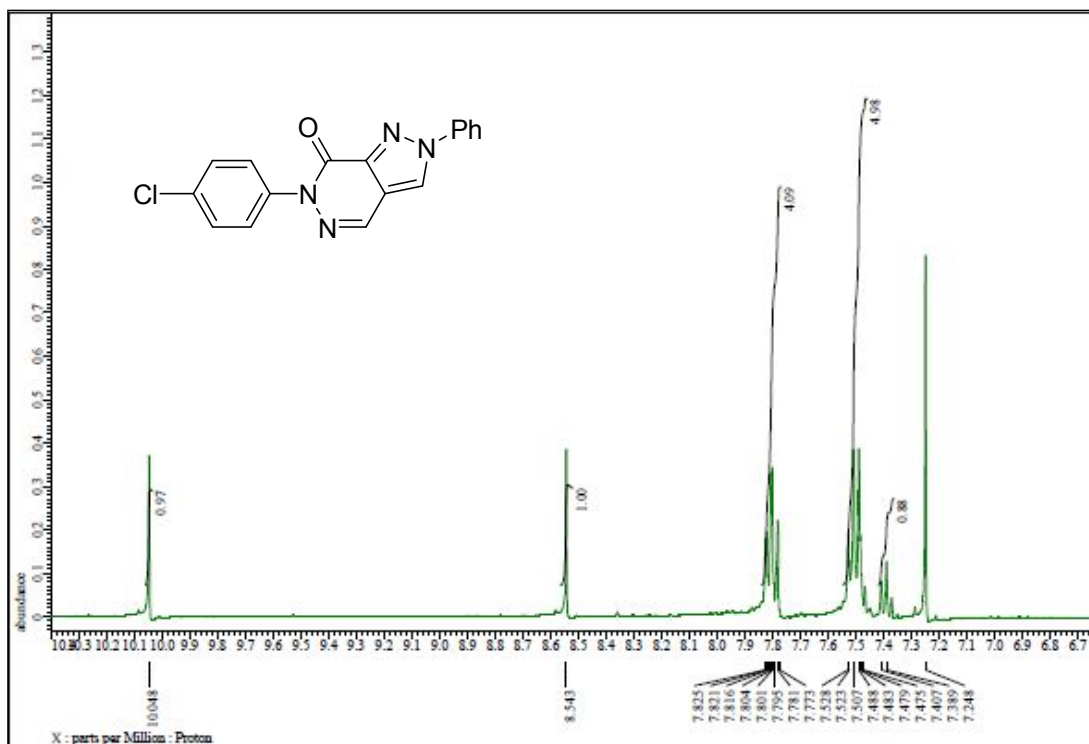

Figure S23: <sup>1</sup>H NMR Expansion spectrum (DMSO-d<sub>6</sub>) of Compound 7g

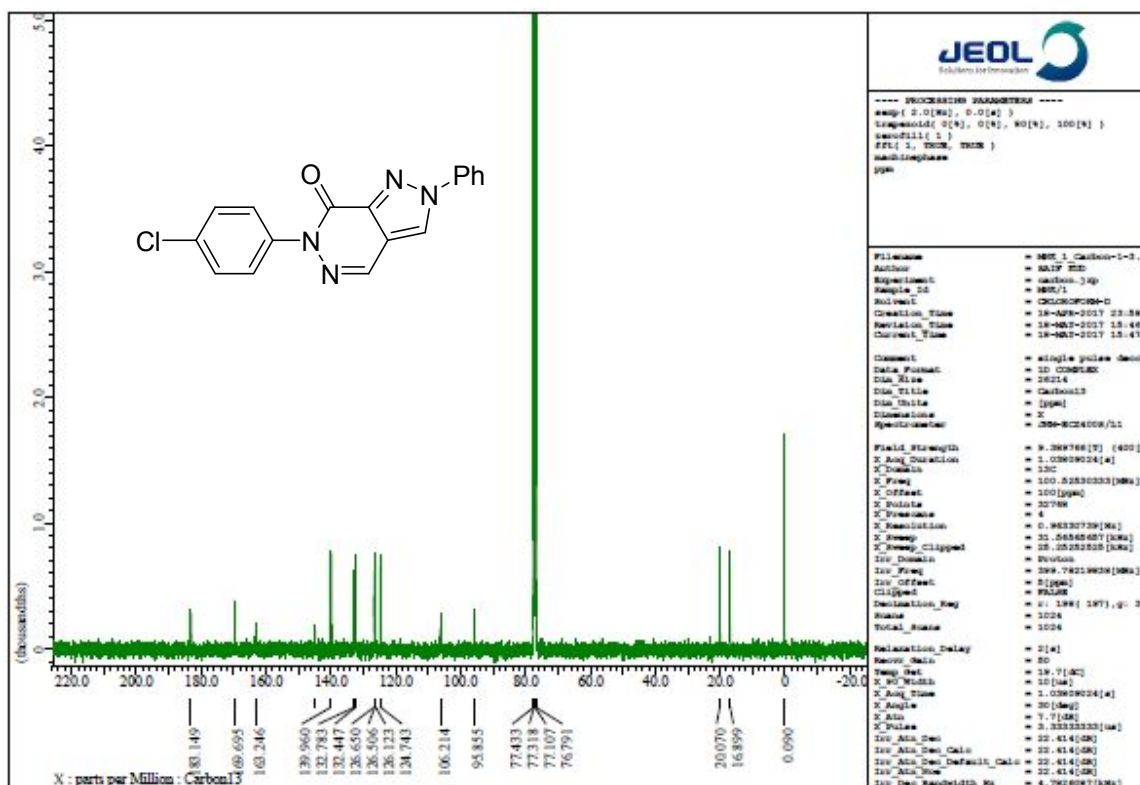

Figure S24: <sup>13</sup>C NMR Spectrum (DMSO-d<sub>6</sub>) of Compound 7g

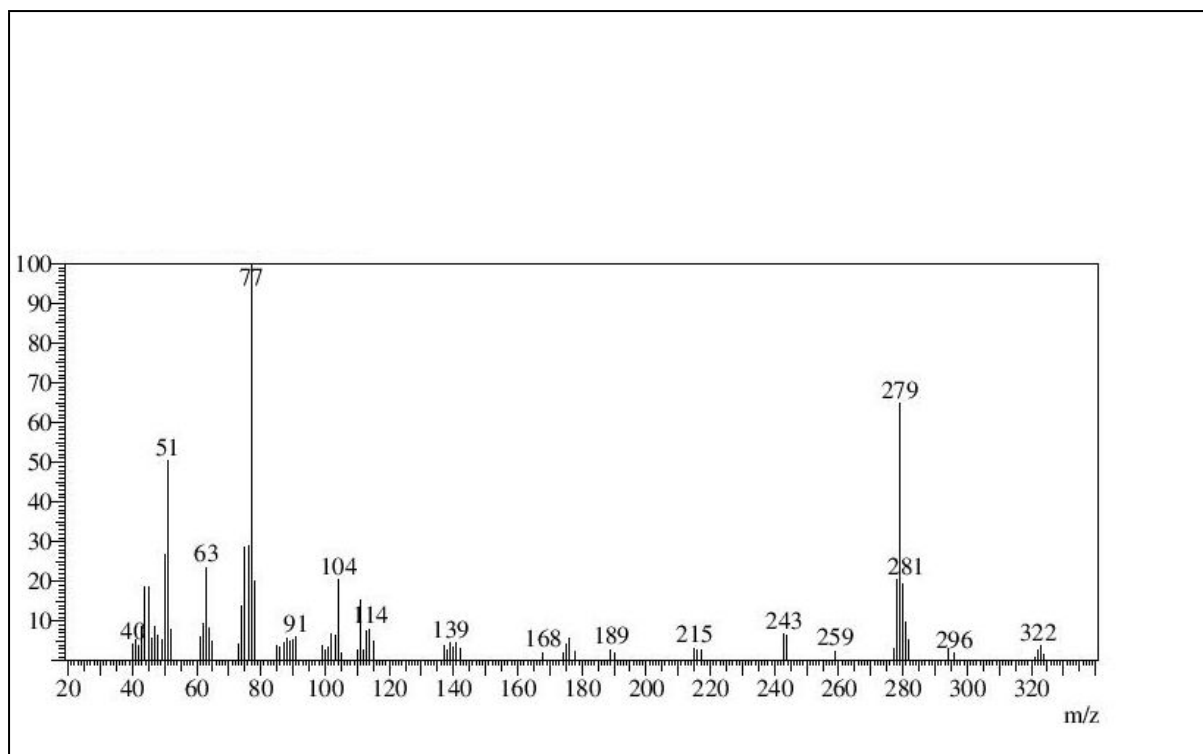

Figure S25: Mass spectrum of compound 7g

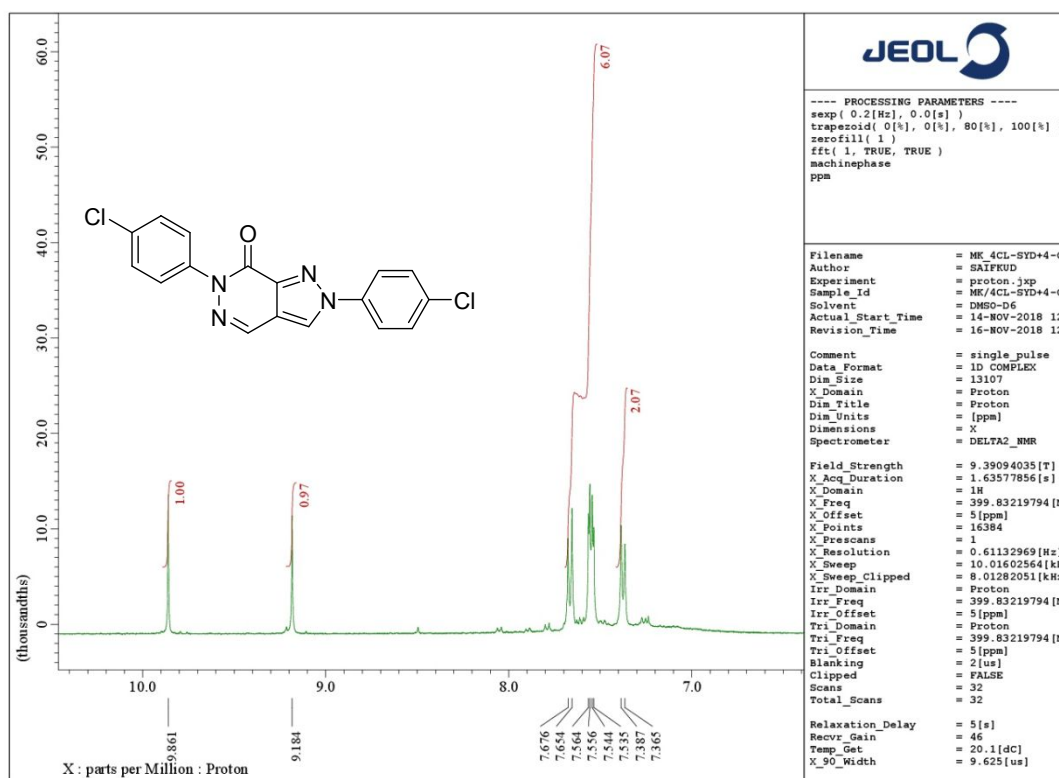

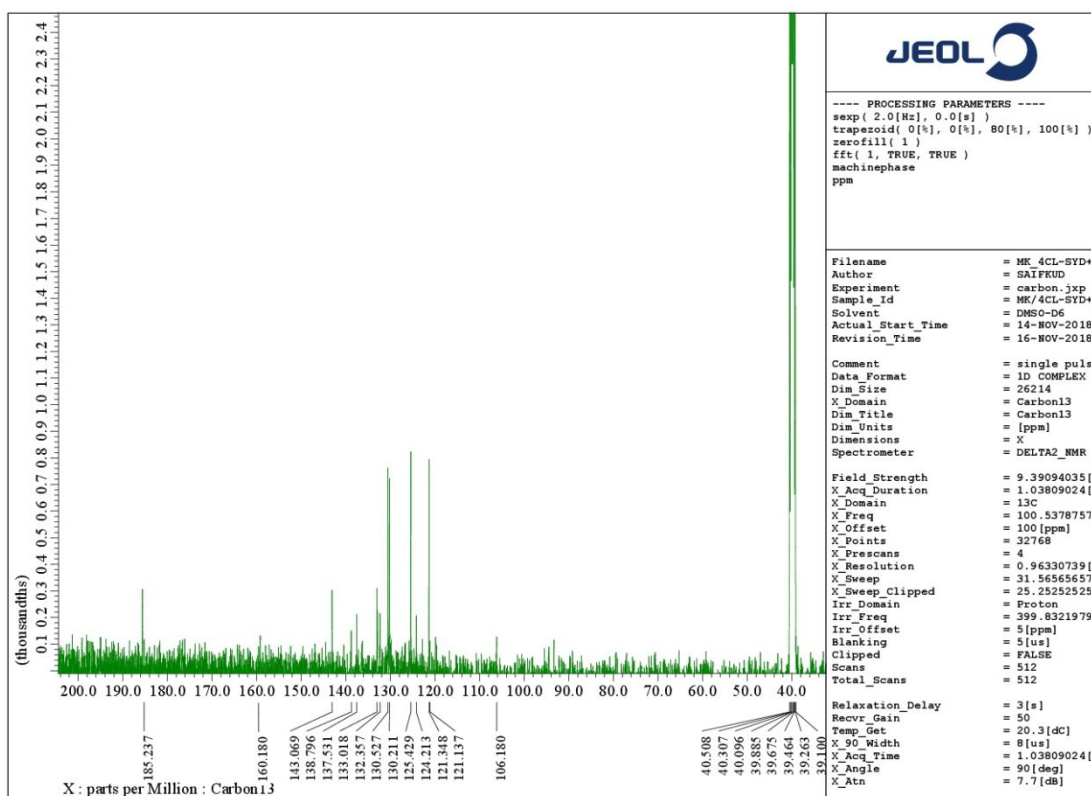

Figure S26:  $^1\text{H}$  NMR Expansion spectrum (DMSO- $d_6$ ) of Compound 7h

Figure S27:  $^{13}\text{C}$  NMR Spectrum (DMSO- $d_6$ ) of Compound 7h

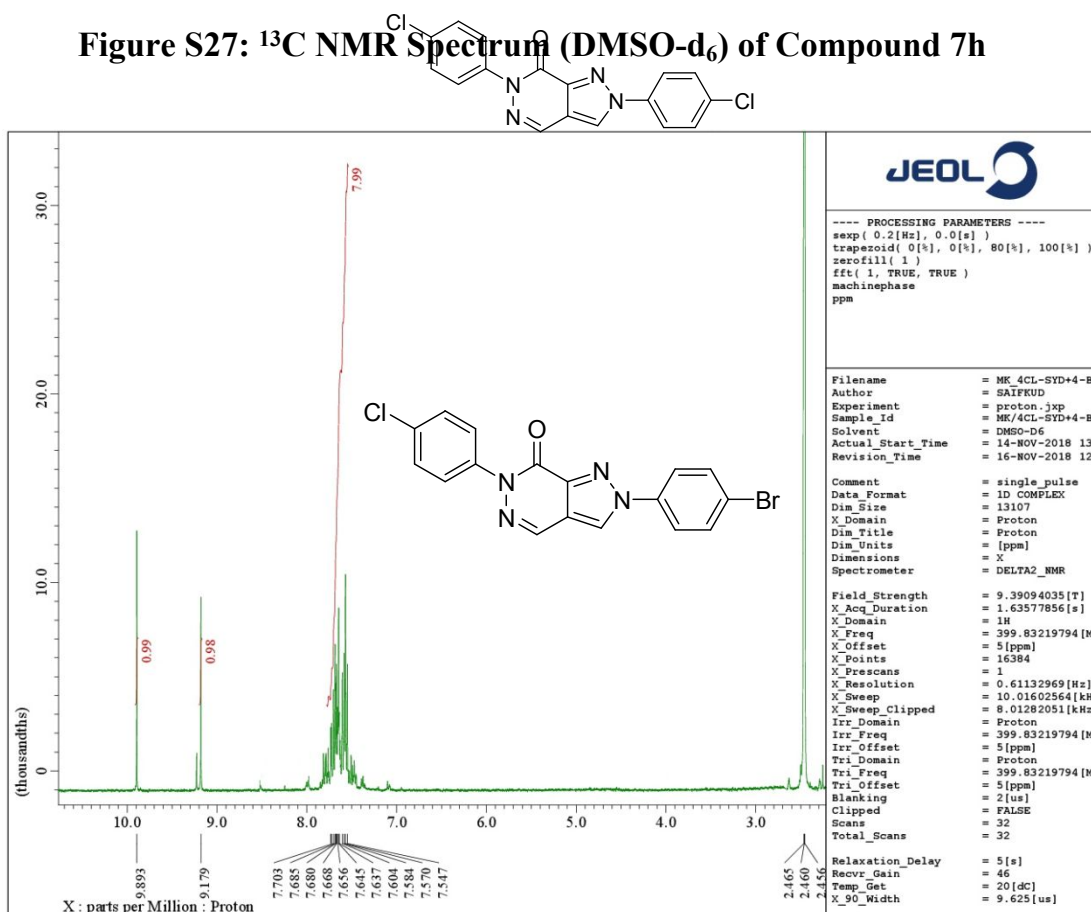

Figure S28: <sup>1</sup>H NMR Spectrum (DMSO-d<sub>6</sub>) of Compound 7i

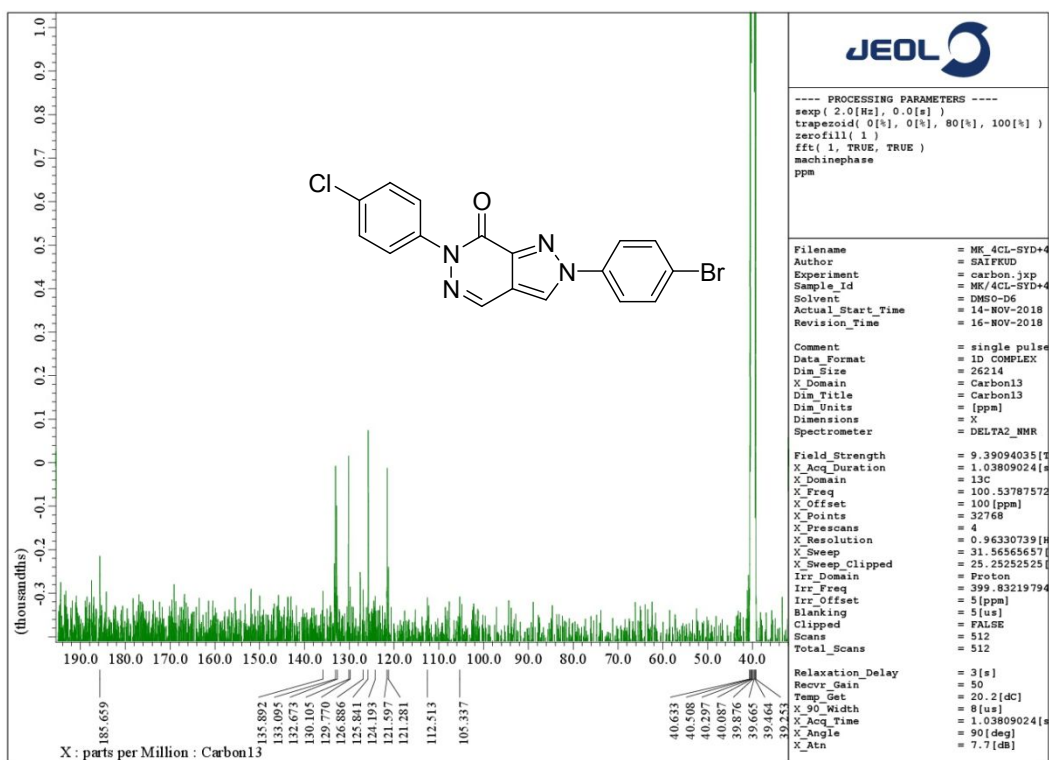

Figure S29: <sup>13</sup>C NMR Spectrum (DMSO-d<sub>6</sub>) of Compound 7i

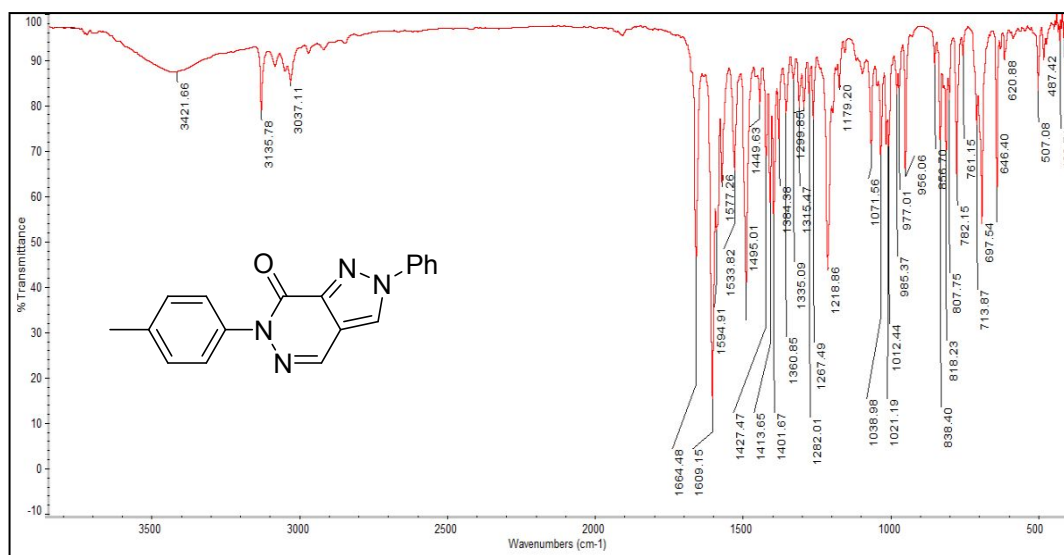

Figure S30: IR spectrum of compound 7j



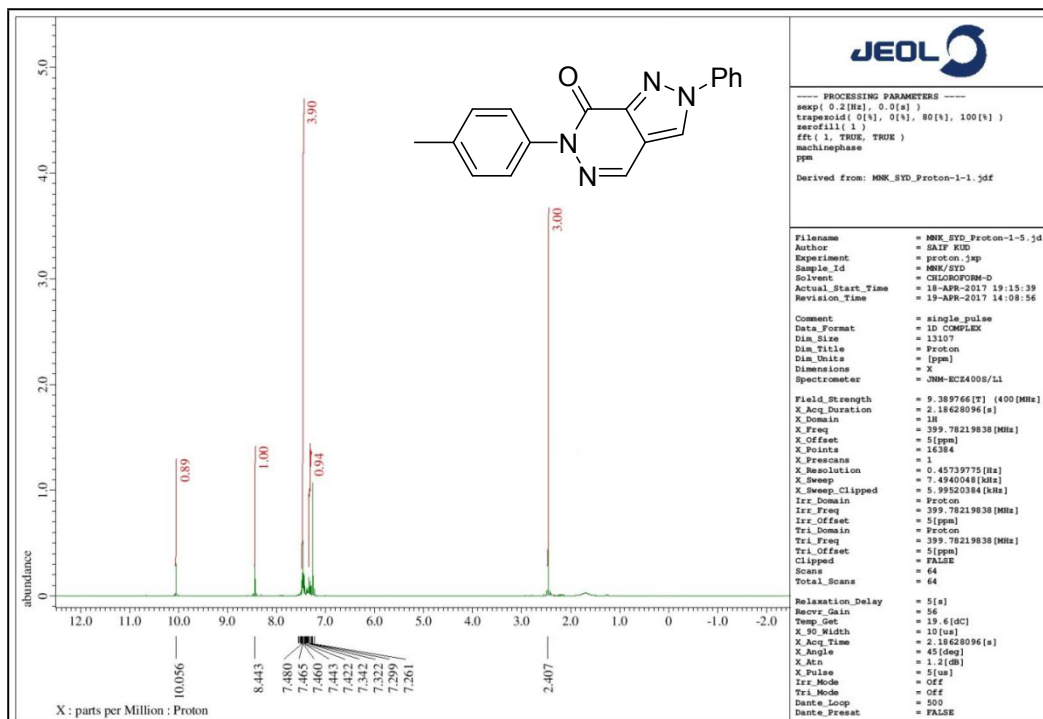

Figure S31:  $^1\text{H}$  NMR Spectrum (DMSO- $d_6$ ) of Compound 7j

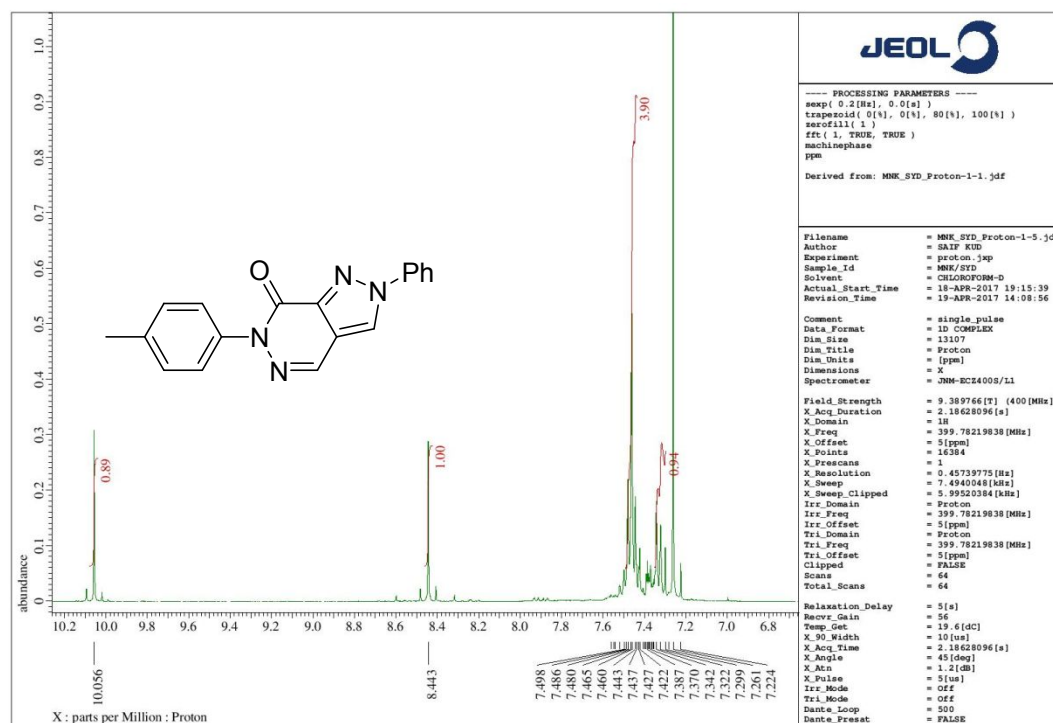

Figure S32:  $^1\text{H}$  NMR Expansion Spectrum (DMSO- $d_6$ ) of Compound 7j

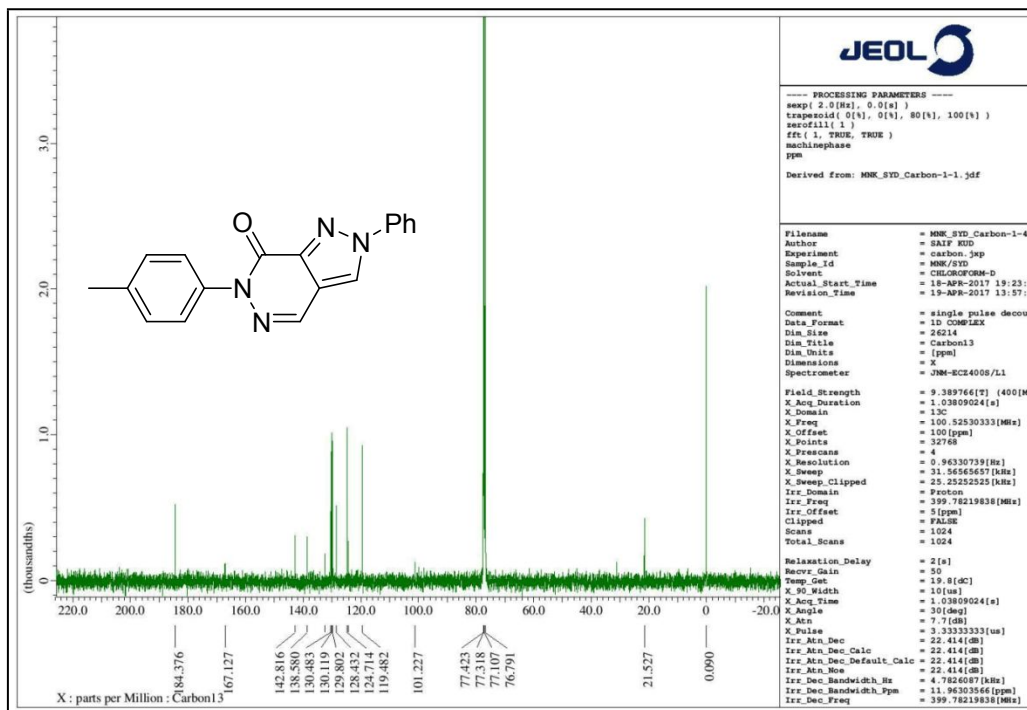

Figure S33:  $^{13}\text{C}$  NMR Spectrum (DMSO- $d_6$ ) of Compound 7j

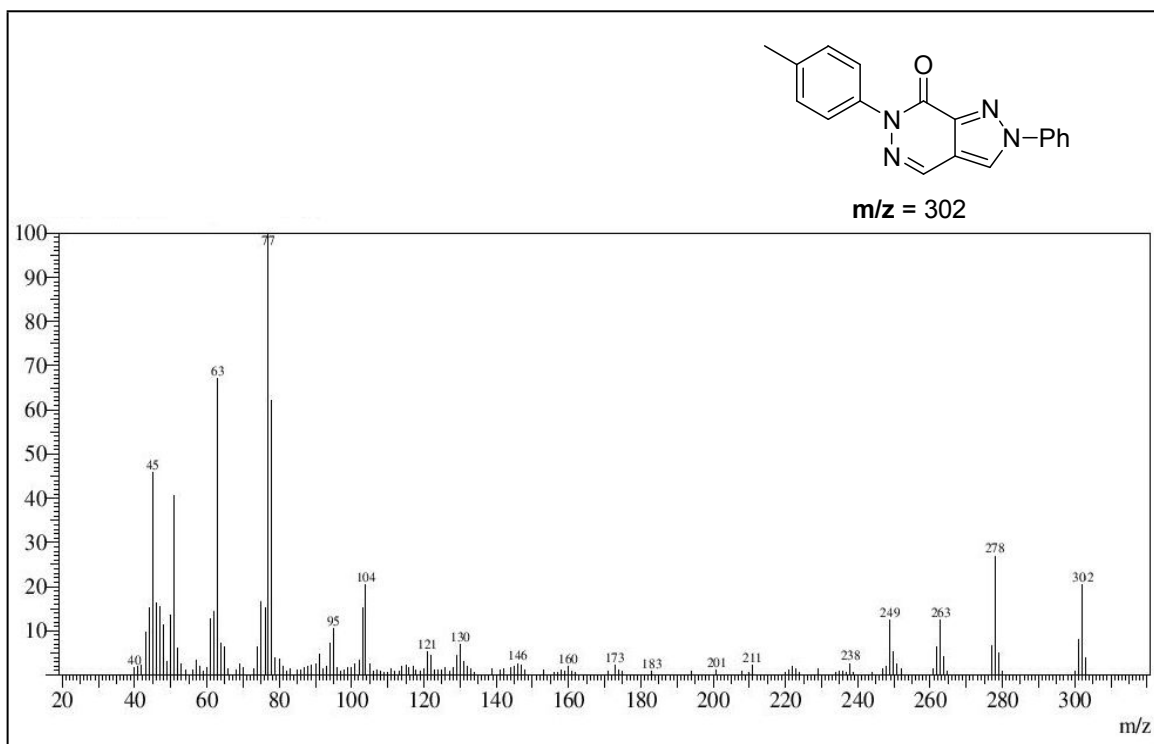

Figure S34: Mass spectrum of compound 7j

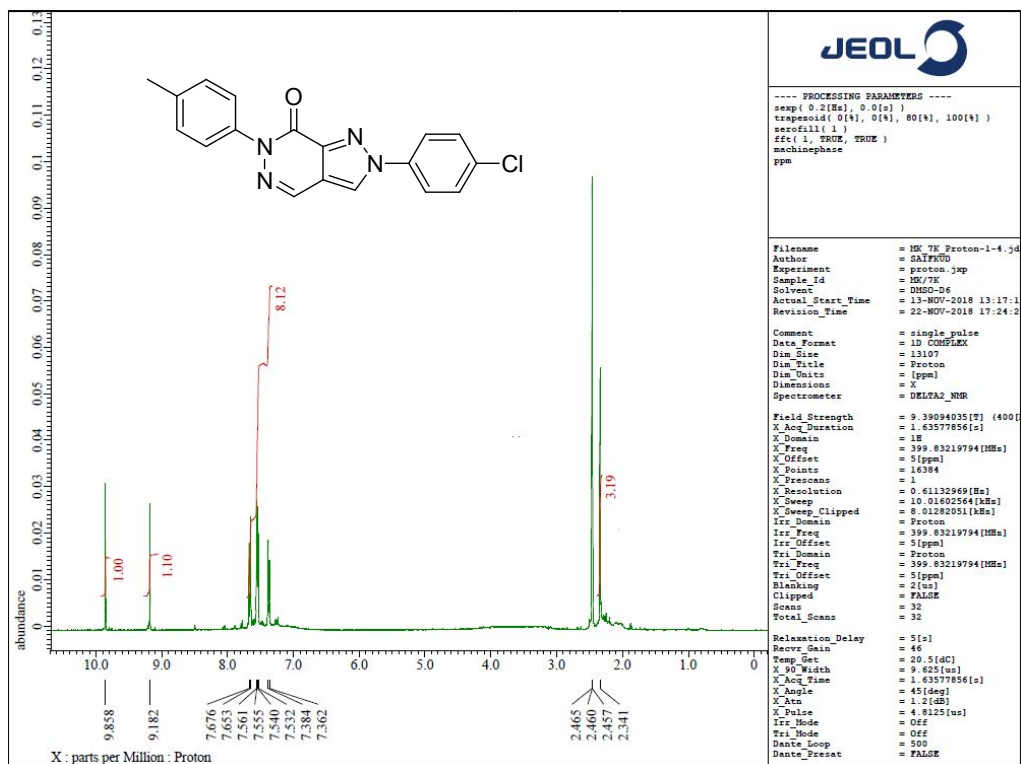

Figure S35: <sup>1</sup>H NMR Spectrum (DMSO-d<sub>6</sub>) of Compound 7k

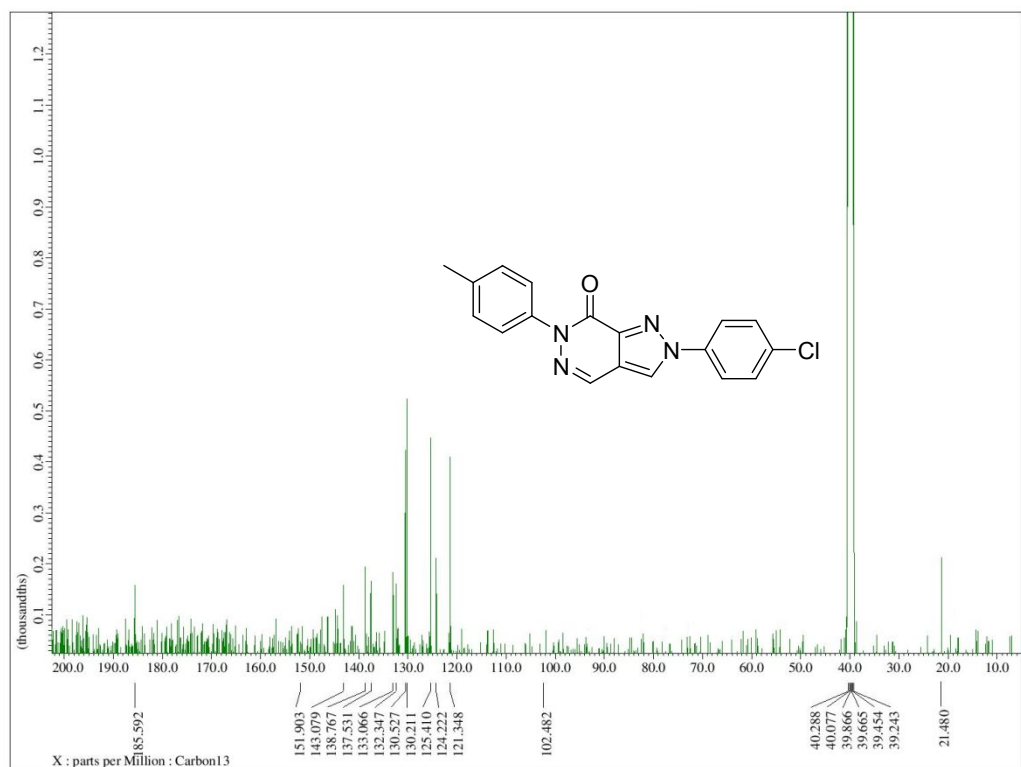

Figure S36: <sup>13</sup>C NMR Spectrum (DMSO-d<sub>6</sub>) of Compound 7k

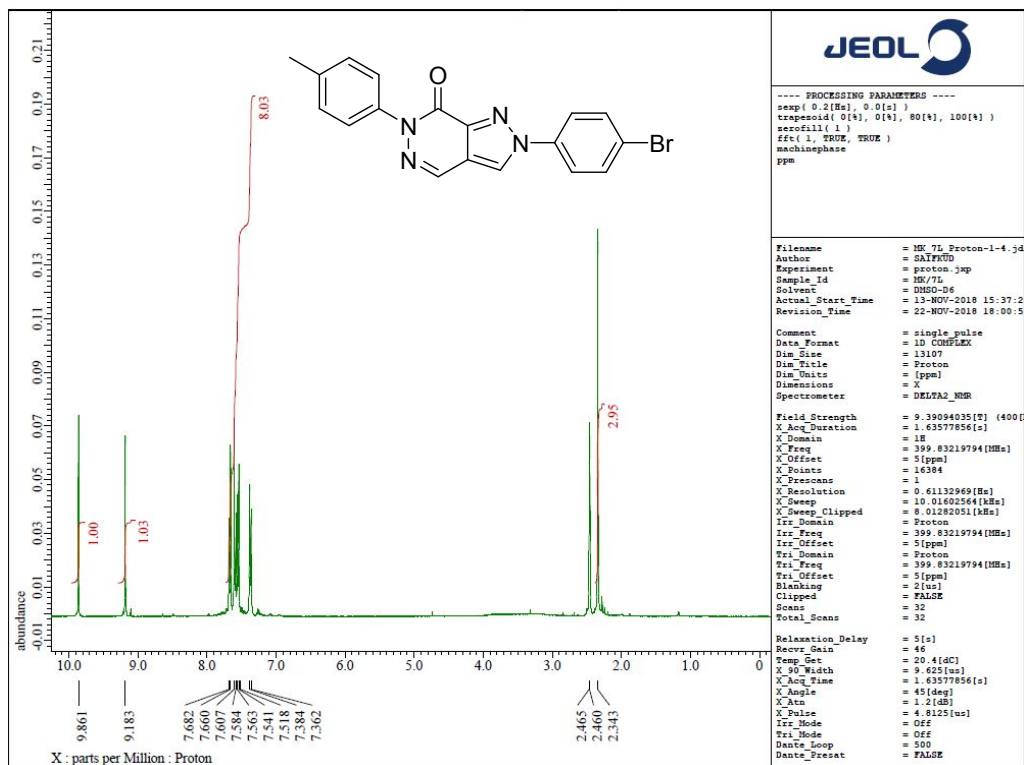

**Figure S37: <sup>1</sup>H NMR Spectrum (DMSO-d<sub>6</sub>) of Compound 71**

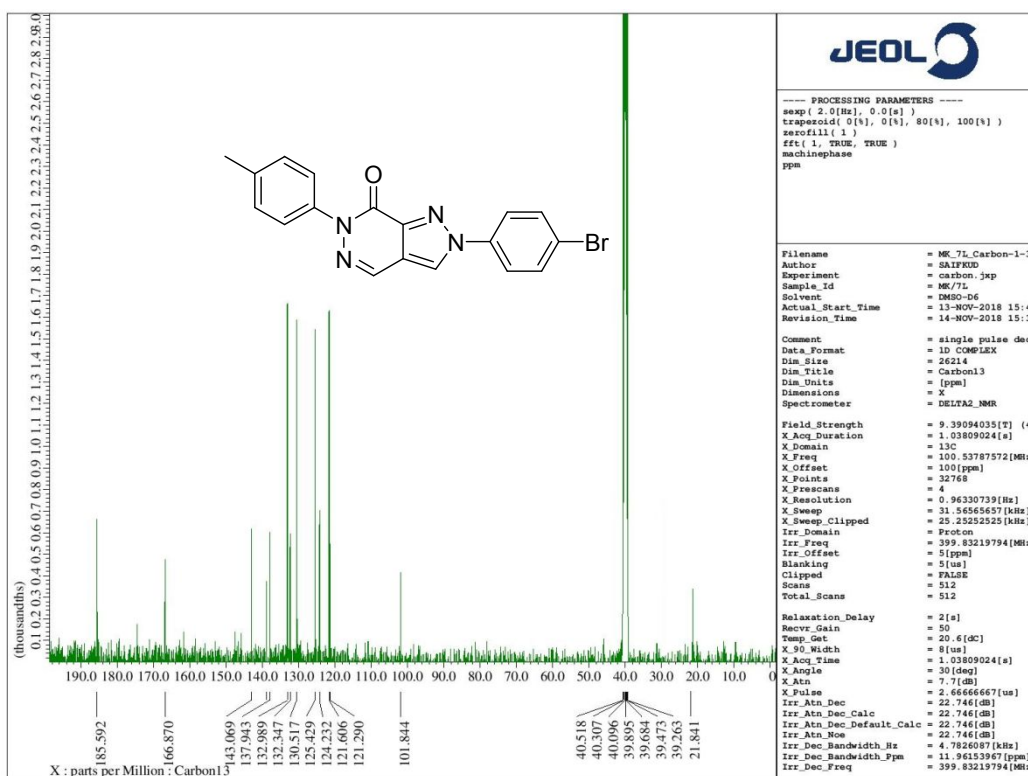

**Figure S38: <sup>13</sup>C NMR Spectrum (DMSO-d<sub>6</sub>) of Compound 71**

X-Ray data for compound 4a and 7d

The X-Ray crystals of compound **4a** and **7d** were obtained from slow evaporation of acetone (solvent) at room temperature and suitable crystal was selected. The crystal structure studies were elucidated by Bruker SMART CCD area-detector with monochromatic Mo- $K\alpha$  radiation at room temperature. The raw data frame-works was unified with the SAINT<sup>1</sup> program by using narrow-frame algorithm. The structures were solved by direct methods and refined by the Olex2<sup>2</sup> in anisotropic approximation for all non-hydrogen atoms. The structure was also solved by using charge flipping and refined with the ShelXL refinement package using least squares minimization.<sup>3</sup>

The crystalline nature of the compound is characterized by long range, well defined three dimensional orders. An ORTEP view of the molecule **4a** and also their packing diagram were depicted in **Figure S39**. The crystal data, refinements are represented in **Table 1**. The X-ray structure clearly suggests that it crystallizes in triclinic system with space group P-1. Asymmetric unit of this contains full molecules and there are two such molecules present in the unit cell.

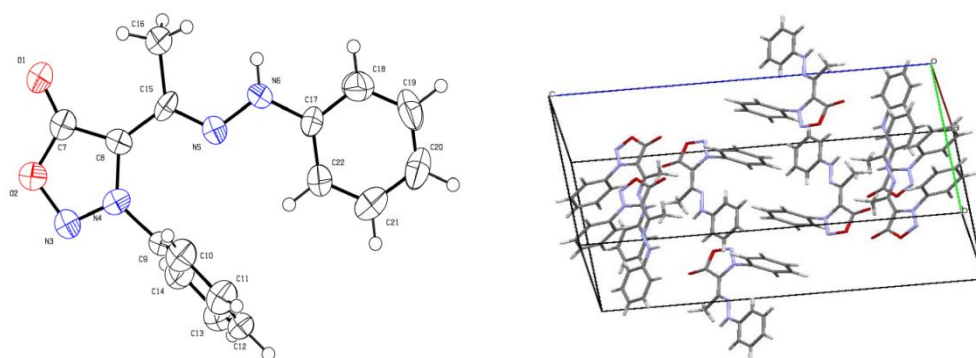

**Figure S39.** ORTEP and packing structure of compound **4a**

**Table S1.** Crystallographic parameters

| Identification code                                | <b>4a</b>                                                                                                          | <b>7d</b>                                                                                                                          |
|----------------------------------------------------|--------------------------------------------------------------------------------------------------------------------|------------------------------------------------------------------------------------------------------------------------------------|
| CCDC No.                                           | 1861797                                                                                                            | 1861799                                                                                                                            |
| Empirical formula                                  | C <sub>16</sub> H <sub>14</sub> N <sub>4</sub> O <sub>2</sub>                                                      | C <sub>18</sub> H <sub>14</sub> N <sub>4</sub> O <sub>2</sub>                                                                      |
| Formula weight                                     | 294.31                                                                                                             | 390.79                                                                                                                             |
| Temperature, K                                     | 296.15                                                                                                             | 296                                                                                                                                |
| Crystal system                                     | monoclinic                                                                                                         | Triclinic                                                                                                                          |
| Space group                                        | C2/c                                                                                                               | P-1                                                                                                                                |
| <b>Unit cell dimensions</b>                        | a = 10.8821(12) Å<br>b = 12.5865(15) Å<br>c = 21.550(3) Å<br>$\alpha = 90$<br>$\beta = 97.800(6)$<br>$\gamma = 90$ | a = 7.1518 (5) Å<br>b = 9.4847 (6) Å<br>c = 1.5844 (7) Å<br>$\alpha = 86.266 (4)$<br>$\beta = 76.396 (3)$<br>$\gamma = 88.766 (3)$ |
| Volume, Å <sup>3</sup>                             | 2924.3(6)                                                                                                          | 762.12 (9)                                                                                                                         |
| Z                                                  | 8                                                                                                                  | 2                                                                                                                                  |
| Absorption coefficient ( $\mu$ )                   | 0.092                                                                                                              | 0.094 mm <sup>-1</sup>                                                                                                             |
| Density, $\rho_{\text{calc}}$ , g cm <sup>-3</sup> | 1.337                                                                                                              | 1.387                                                                                                                              |
| F (000)                                            | 1232.0                                                                                                             | 332.0                                                                                                                              |
| <b>Data Collection</b>                             |                                                                                                                    |                                                                                                                                    |
| Diffractometer                                     | Bruker APEX-II CCD                                                                                                 | Bruker APEX-II CCD                                                                                                                 |
| Data collection method                             | $\omega - \chi$ Scans                                                                                              | $\omega - \chi$ Scans                                                                                                              |
| Absorption correction                              | Multi-Scan                                                                                                         | Multi-Scan                                                                                                                         |
| Theta range for data collection                    | 4.98 to 50.08                                                                                                      | 0.977-28.43°                                                                                                                       |
| Independent reflections                            | 1987                                                                                                               | 3850                                                                                                                               |
| R(reflections);<br>wR2(reflections)                | 0.1236, 0.3041                                                                                                     | 0.0497, 0.1395                                                                                                                     |
| GOF on $F^2$                                       | 1.317                                                                                                              | 1.062                                                                                                                              |

**Table S2. Crystal data for compound 4a**

Fractional Atomic Coordinates ( $\times 10^4$ ) and Equivalent Isotropic Displacement Parameters ( $\text{\AA}^2 \times 10^3$ ).  $U_{\text{eq}}$  is defined as 1/3 of the trace of the orthogonalized  $U_{ij}$  tensor.

| Atom | <i>x</i> | <i>y</i> | <i>z</i>   | <i>U</i> (eq) |
|------|----------|----------|------------|---------------|
| N4   | 4952(4)  | 2645(4)  | 6352(2)    | 52.6(13)      |
| O2   | 5778(4)  | 1294(3)  | 6826.7(18) | 74.3(14)      |
| O1   | 7146(4)  | 2049(3)  | 7584.2(18) | 74.4(14)      |
| N5   | 5285(4)  | 4856(3)  | 6680.0(18) | 51.7(12)      |
| N6   | 5528(4)  | 5894(3)  | 6798.9(19) | 56.6(13)      |
| C17  | 4707(4)  | 6650(4)  | 6511(2)    | 44.8(13)      |
| C8   | 5794(5)  | 3070(4)  | 6821(2)    | 50.3(14)      |
| N3   | 4899(5)  | 1615(4)  | 6337(2)    | 74.2(16)      |
| C12  | 2480(6)  | 4098(4)  | 4966(2)    | 61.4(16)      |
| C15  | 6049(4)  | 4152(4)  | 6945(2)    | 49.0(14)      |
| C22  | 3668(5)  | 6396(4)  | 6103(2)    | 55.8(15)      |
| C18  | 4963(5)  | 7706(5)  | 6638(3)    | 60.5(16)      |
| C9   | 4100(5)  | 3183(4)  | 5881(2)    | 53.6(15)      |
| C7   | 6355(5)  | 2169(5)  | 7135(3)    | 61.1(16)      |
| C19  | 4219(6)  | 8486(5)  | 6344(3)    | 71.4(18)      |
| C20  | 3189(6)  | 8229(5)  | 5933(3)    | 75.3(19)      |
| C21  | 2927(6)  | 7163(5)  | 5819(3)    | 71.3(18)      |
| C14  | 2888(5)  | 3250(5)  | 5953(3)    | 64.5(16)      |
| C10  | 4530(5)  | 3558(5)  | 5350(3)    | 63.8(16)      |
| C13  | 2067(6)  | 3707(5)  | 5487(3)    | 74.1(18)      |
| C16  | 7204(5)  | 4457(5)  | 7395(3)    | 69.2(18)      |
| C11  | 3686(6)  | 4026(5)  | 4891(3)    | 70.0(17)      |

**Table S3.** Anisotropic Displacement Parameters ( $\text{\AA}^2 \times 10^3$ ). The Anisotropic displacement factor exponent takes the form:  $-2\pi^2[h^2a^2U_{11}+2hka*b*U_{12}+\dots]$ .

| Atom | U <sub>11</sub> | U <sub>22</sub> | U <sub>33</sub> | U <sub>23</sub> | U <sub>13</sub> | U <sub>12</sub> |
|------|-----------------|-----------------|-----------------|-----------------|-----------------|-----------------|
| N4   | 51(3)           | 49(3)           | 52(3)           | 1(2)            | -14(2)          | 2(2)            |
| O2   | 81(3)           | 46(3)           | 83(3)           | -2(2)           | -33(2)          | -1(2)           |
| O1   | 88(3)           | 47(3)           | 76(3)           | 4(2)            | -32(2)          | 11(2)           |
| N5   | 58(3)           | 34(3)           | 58(3)           | -0.9(19)        | -7(2)           | 0(2)            |
| N6   | 60(3)           | 34(3)           | 68(3)           | -7(2)           | -22(2)          | -1(2)           |
| C17  | 47(3)           | 37(3)           | 48(3)           | 7(2)            | 1(2)            | 10(2)           |
| C8   | 53(3)           | 39(3)           | 54(3)           | -5(2)           | -10(2)          | -3(2)           |
| N3   | 85(4)           | 38(3)           | 88(3)           | -1(2)           | -32(3)          | -1(3)           |
| C12  | 74(4)           | 42(3)           | 58(3)           | 4(3)            | -27(3)          | 0(3)            |
| C15  | 47(3)           | 48(3)           | 47(3)           | 14(2)           | -9(2)           | 13(3)           |
| C22  | 60(3)           | 37(3)           | 68(3)           | 3(3)            | -3(3)           | 3(3)            |
| C18  | 52(3)           | 61(4)           | 66(4)           | -8(3)           | -1(3)           | -1(3)           |
| C9   | 56(3)           | 35(3)           | 62(3)           | -3(2)           | -21(3)          | -3(2)           |
| C7   | 64(4)           | 46(3)           | 68(4)           | 6(3)            | -13(3)          | 5(3)            |
| C19  | 77(4)           | 32(3)           | 108(5)          | 1(3)            | 23(4)           | -3(3)           |
| C20  | 73(4)           | 59(4)           | 92(4)           | 24(4)           | 6(4)            | 25(4)           |
| C21  | 59(4)           | 79(5)           | 71(4)           | 8(4)            | -11(3)          | 11(3)           |
| C14  | 54(4)           | 57(4)           | 78(4)           | 10(3)           | -5(3)           | -1(3)           |
| C10  | 64(4)           | 60(4)           | 64(4)           | 5(3)            | -2(3)           | 1(3)            |
| C13  | 59(4)           | 65(4)           | 92(4)           | 7(4)            | -14(3)          | -4(3)           |
| C16  | 69(4)           | 44(4)           | 84(4)           | 0(3)            | -28(3)          | 1(3)            |
| C11  | 78(4)           | 63(4)           | 64(4)           | 10(3)           | -6(3)           | 3(3)            |

**Table S4.** Bond Lengths.

| Atom | Atom | Length/Å | Atom | Atom | Length/Å |
|------|------|----------|------|------|----------|
|------|------|----------|------|------|----------|



|     |     |          |     |     |          |
|-----|-----|----------|-----|-----|----------|
| N4  | C8  | 1.377(6) | C8  | C7  | 1.415(8) |
| N4  | N3  | 1.298(6) | C12 | C13 | 1.356(8) |
| N4  | C9  | 1.448(6) | C12 | C11 | 1.347(8) |
| O2  | N3  | 1.384(6) | C15 | C16 | 1.528(7) |
| O2  | C7  | 1.391(7) | C22 | C21 | 1.351(8) |
| O1  | C7  | 1.214(6) | C18 | C19 | 1.371(8) |
| N5  | N6  | 1.351(6) | C9  | C14 | 1.351(7) |
| N5  | C15 | 1.293(6) | C9  | C10 | 1.378(7) |
| N6  | C17 | 1.392(6) | C19 | C20 | 1.370(8) |
| C17 | C22 | 1.373(7) | C20 | C21 | 1.386(9) |
| C17 | C18 | 1.377(7) | C14 | C13 | 1.377(8) |
| C8  | C15 | 1.409(7) | C10 | C11 | 1.385(7) |

**Table S5.** Bond Angles.

| Atom | Atom | Atom | Angle/°  | Atom | Atom | Atom | Angle/°  |
|------|------|------|----------|------|------|------|----------|
| C8   | N4   | C9   | 129.2(4) | C8   | C15  | C16  | 119.1(4) |
| N3   | N4   | C8   | 115.5(4) | C21  | C22  | C17  | 120.9(6) |
| N3   | N4   | C9   | 115.3(4) | C19  | C18  | C17  | 120.5(5) |
| N3   | O2   | C7   | 110.7(4) | C14  | C9   | N4   | 119.4(5) |
| C15  | N5   | N6   | 118.7(4) | C14  | C9   | C10  | 121.4(5) |
| N5   | N6   | C17  | 118.7(4) | C10  | C9   | N4   | 119.1(5) |
| C22  | C17  | N6   | 123.3(5) | O2   | C7   | C8   | 105.6(5) |
| C22  | C17  | C18  | 118.6(5) | O1   | C7   | O2   | 120.5(5) |
| C18  | C17  | N6   | 118.1(5) | O1   | C7   | C8   | 133.9(6) |
| N4   | C8   | C15  | 127.5(5) | C20  | C19  | C18  | 120.6(6) |

|     |     |     |          |     |     |     |          |
|-----|-----|-----|----------|-----|-----|-----|----------|
| N4  | C8  | C7  | 103.9(5) | C19 | C20 | C21 | 118.3(6) |
| C15 | C8  | C7  | 128.6(5) | C22 | C21 | C20 | 121.0(6) |
| N4  | N3  | O2  | 104.3(4) | C9  | C14 | C13 | 119.3(6) |
| C11 | C12 | C13 | 120.9(5) | C9  | C10 | C11 | 118.1(5) |
| N5  | C15 | C8  | 118.7(5) | C12 | C13 | C14 | 120.0(6) |
| N5  | C15 | C16 | 122.2(5) | C12 | C11 | C10 | 120.3(6) |

**Table S6.** Hydrogen Atom Coordinates ( $\text{\AA} \times 10^4$ ) and Isotropic Displacement Parameters ( $\text{\AA}^2 \times 10^3$ ) for

| Atom | <i>x</i> | <i>y</i> | <i>z</i> | U(eq) |
|------|----------|----------|----------|-------|
| H6   | 6176     | 6084     | 7048     | 68    |
| H12  | 1924     | 4419     | 4657     | 74    |
| H22  | 3471     | 5686     | 6022     | 67    |
| H18  | 5646     | 7891     | 6925     | 73    |
| H19  | 4416     | 9196     | 6425     | 86    |
| H20  | 2678     | 8755     | 5736     | 90    |
| H21  | 2231     | 6974     | 5541     | 86    |
| H14  | 2612     | 2989     | 6314     | 77    |
| H10  | 5363     | 3499     | 5300     | 77    |
| H13  | 1229     | 3749     | 5529     | 89    |
| H16A | 7567     | 5086     | 7245     | 104   |
| H16B | 7794     | 3886     | 7419     | 104   |
| H16C | 6977     | 4590     | 7803     | 104   |
| H11  | 3954     | 4293     | 4530     | 84    |

## References

- (1) Dolomanov, O. V.; Bourhis, L. J.; Gildea, R. J.; Howard, J. A. K.; Puschmann, H. *OLEX2: a complete structure solution, refinement and analysis program. J. Appl. Cryst.* **2009**, *42*, 339-341.
- (2) Sheldrick, G. M. *SHELXT*—Integrated space-group and crystal-structure determination. *Acta. Cryst. A.* **2015**, *71*, 3-8.
- (3) Sheldrick, G. M. Crystal structure refinement with SHELXL. *Acta. Cryst. C.* **2015**, *71*, 3-8.
